# Supplementary material for: Measurement and prevalence of sexual harassment in low- and middle-income countries: a systematic review and meta-analysis
Source: PubMed Central journal article supplement — BMJ Open. 2021 Jun 24;11(6):e047473. doi: 10.1136/bmjopen-2020-047473 (PMC8231049; doi:10.1136/bmjopen-2020-047473), 2021-06-24
Supplement: bmjopen-2020-047473supp001.pdf [file bmjopen-2020-047473supp001.pdf]

## Appendices

### Appendix 1: Search terms used for Ovid Medline, EMBASE, and PSYCIInfo.

---

1. ((developing or less\* developed or under developed or underdeveloped or middle income or low\* income or underserved or under served or deprived or poor\*) adj (economy or economies)).ti,ab.
2. ((developing or less\* developed or under developed or underdeveloped or middle income or low\* income or underserved or under served or deprived or poor\*) adj (countr\* or nation? or population? or world)).ti,ab.
3. (low\* adj (gdp or gnp or gross domestic or gross national)).ti,ab.
4. (low adj3 middle adj3 countr\*).ti,ab.
5. (Imic or Imics or third world or lami countr\*).ti,ab.
6. transitional countr\*.ti,ab.
7. global south.ti,ab.
8. Developing Countries/
9. "africa south of the sahara"/ or africa, central/ or africa, eastern/ or africa, southern/ or africa, western/
10. ("africa south of the sahara" or sub-saharan africa or central africa or eastern africa or southern africa or western africa).ti,ab.
11. "Democratic People's Republic of Korea"/
12. (north korea or (democratic people\* republic adj2 korea)).ti,ab.
13. Cambodia/
14. cambodia.ti,ab.
15. Indonesia/
16. indonesia.ti,ab.
17. Micronesia/
18. Kiribati.ti,ab.
19. Laos/
20. (laos or (lao adj1 democratic republic)).ti,ab.
21. (marshall island\* or caroline island\* or ellice island\* or gilbert island\* or johnston island\* or mariana island\* or micronesia or pacific island\*).ti,ab.
22. Mongolia/
23. mongolia.ti,ab.
24. Myanmar/
25. (myanmar or burma).ti,ab.
26. Papua New Guinea/
27. Papua New Guinea.ti,ab.
28. Philippines/
29. Philippines.ti,ab.
30. Timor-Leste/
31. Timor-Leste.ti,ab.
32. Vanuatu/
33. Vanuatu.ti,ab.
34. Vietnam/
35. (Viet Nam or Vietnam).ti,ab.
36. American Samoa/
37. american samoa.ti,ab.
38. exp China/
39. china.ti,ab.
40. Fiji/

41. fiji.ti,ab.
42. Malaysia/
43. malaysia.ti,ab.
44. marshall islands.ti,ab.
45. nauru.ti,ab.
46. samoa/
47. "independent state of samoa"/
48. ("independent state of samoa" or (samoa not american samoa) or western samoa or navigator islands or samoan islands).ti,ab.
49. Thailand/
50. Thailand.ti,ab.
51. Tonga/
52. tonga.ti,ab.
53. Tuvalu.ti,ab.
54. Armenia/
55. Armenia.ti,ab.
56. "Georgia (Republic)"/
57. Kosovo/
58. Kosovo.ti,ab.
59. Kyrgyzstan/
60. (kyrgyzstan or kyrgyz republic or kirghizia or kirghiz).ti,ab.
61. Moldova/
62. Moldova.ti,ab.
63. Tajikistan/
64. tajikistan.ti,ab.
65. Ukraine/
66. Ukraine.ti,ab.
67. Uzbekistan/
68. Uzbekistan.ti,ab.
69. Albania/
70. Albania.ti,ab.
71. Azerbaijan/
72. Azerbaijan.ti,ab.
73. "Republic of Belarus"/
74. (belarus or byelarus or belorussia).ti,ab.
75. Bosnia-Herzegovina/
76. (bosnia or herzegovina).ti,ab.
77. Bulgaria/
78. Bulgaria.ti,ab.
79. Kazakhstan/
80. (Kazakhstan or kazakh).ti,ab.
81. "Macedonia (Republic)"/
82. Macedonia.ti,ab.
83. Montenegro/
84. Montenegro.ti,ab.
85. Romania/
86. Romania.ti,ab.
87. exp Russia/
88. USSR/
89. (Russia or Russian Federation or USSR or Union of Soviet Socialist Republics or Soviet Union).mp.
90. Serbia/

91. serbia.ti,ab.
92. Turkey/
93. turkey.ti,ab. not animal/
94. Turkmenistan/
95. Turkmenistan.ti,ab.
96. Yugoslavia/
97. yugoslavia.ti,ab.
98. Haiti/
99. Haiti.ti,ab.
100. Bolivia/
101. Bolivia.ti,ab.
102. El Salvador/
103. El Salvador.ti,ab.
104. Guatemala/
105. Guatemala.ti,ab.
106. Honduras/
107. Honduras.ti,ab.
108. Nicaragua/
109. Nicaragua.ti,ab.
110. Belize/
111. Belize.ti,ab.
112. Brazil/
113. Brazil.ti,ab.
114. Colombia/
115. Colombia.ti,ab.
116. Costa Rica/
117. Costa Rica.ti,ab.
118. Cuba/
119. Cuba.ti,ab.
120. Dominica/
121. Dominica.ti,ab.
122. Dominican Republic/
123. Dominican Republic.ti,ab.
124. Ecuador/
125. Ecuador.ti,ab.
126. Grenada/
127. Grenada.ti,ab.
128. Guyana/
129. Guyana.mp.
130. Jamaica/
131. Jamaica.ti,ab.
132. Mexico/
133. Mexico.ti,ab.
134. Paraguay/
135. Paraguay.mp.
136. Peru/
137. Peru.ti,ab.
138. Saint Lucia/
139. (St Lucia or Saint Lucia).ti,ab.
140. "Saint Vincent and the Grenadines"/
141. Grenadines.ti,ab.

142. Suriname/
143. Suriname.ti,ab.
144. Venezuela/
145. Venezuela.ti,ab.
146. Djibouti/
147. (Djibouti or French Somaliland).ti,ab.
148. Egypt/
149. Egypt.ti,ab.
150. Jordan/
151. Jordan.ti,ab.
152. Morocco/
153. Morocco.ti,ab.
154. Syria/
155. (Syria or Syrian Arab Republic).ti,ab.
156. Tunisia/
157. tunisia.mp.
158. Gaza.ti,ab.
159. Yemen/
160. Yemen.ti,ab.
161. Algeria/
162. Algeria.ti,ab.
163. Iran/
164. Iran.ti,ab.
165. Iraq/
166. Iraq.ti,ab.
167. Jordan/
168. Jordan.ti,ab.
169. Lebanon/
170. Lebanon.ti,ab.
171. Libya/
172. Libya.ti,ab.
173. Afghanistan/
174. Afghanistan.ti,ab.
175. Nepal/
176. Nepal.ti,ab.
177. Bangladesh/
178. Bangladesh.ti,ab.
179. Bhutan/
180. Bhutan.ti,ab.
181. exp India/
182. India.ti,ab.
183. Pakistan/
184. Pakistan.ti,ab.
185. Sri Lanka/
186. Sri Lanka.ti,ab.
187. Indian Ocean Islands/
188. Maldives.ti,ab.
189. Benin/
190. (Benin or Dahomey).ti,ab.
191. Burkina Faso/
192. (Burkina Faso or Burkina Fasso or Upper Volta).ti,ab.

193. Burundi/
194. Burundi.ti,ab.
195. Central African Republic/
196. (Central African Republic or Ubangi-Shari).ti,ab.
197. Chad/
198. Chad.ti,ab.
199. Comoros/
200. (Comoros or Comoro Islands or Mayotte or Iles Comores).ti,ab.
201. "Democratic Republic of the Congo"/
202. ((democratic republic adj2 congo) or belgian congo or zaire).ti,ab.
203. Eritrea/
204. Eritrea.ti,ab.
205. Ethiopia/
206. Ethiopia.ti,ab.
207. Gambia/
208. Gambia.ti,ab.
209. Guinea/
210. (Guinea not (New Guinea or Guinea Pig\* or Guinea Fowl)).ti,ab.
211. Guinea-Bissau/
212. (Guinea-Bissau or Portuguese Guinea).ti,ab.
213. Liberia/
214. Liberia.ti,ab.
215. Madagascar/
216. (Madagascar or Malagasy Republic).ti,ab.
217. Malawi/
218. (Malawi or Nyasaland).ti,ab.
219. Mali/
220. Mali.ti,ab.
221. Mozambique/
222. (Mozambique or Mocambique or Portuguese East Africa).ti,ab.
223. Niger/
224. (Niger not (Aspergillus or Peptococcus or Schizothorax or Cruciferae or Gobius or Lasius or Agelastes or Melanosuchus or radish or Parastromateus or Orius or Apeergillus or Parastromateus or Stomoxys)).ti,ab.
225. Rwanda/
226. (Rwanda or Ruanda).ti,ab.
227. Senegal/
228. senegal.ti,ab.
229. Sierra Leone/
230. Sierra Leone.mp.
231. Somalia/
232. Somalia.ti,ab.
233. South Sudan/
234. south sudan.ti,ab.
235. Tanzania/
236. (Tanzania or Tanganyika or Zanzibar).ti,ab.
237. Togo/
238. (Togo or Togolese Republic).ti,ab.
239. Uganda/
240. Uganda.ti,ab.
241. Zimbabwe/

242. (Zimbabwe or Rhodesia).ti,ab.
243. Angola/
244. angola.ti,ab.
245. Cameroon/
246. Cameroon.ti,ab.
247. Cape Verde/
248. (Cape Verde or Cabo Verde).ti,ab.
249. Congo/
250. (congo not ((democratic republic adj3 congo) or congo red or crimean-congo)).ti,ab.
251. Cote d'Ivoire/
252. (Cote d'Ivoire or Ivory Coast).ti,ab.
253. Ghana/
254. (Ghana or Gold Coast).ti,ab.
255. Kenya/
256. kenya.mp.
257. Lesotho/
258. (Lesotho or Basutoland).ti,ab.
259. Mauritania/
260. Mauritania.ti,ab.
261. Nigeria/
262. Nigeria.ti,ab.
263. Atlantic Islands/
264. (sao tome adj2 principe).ti,ab.
265. Sudan/
266. (Sudan not south sudan).ti,ab.
267. Swaziland/
268. Swaziland.ti,ab.
269. Zambia/
270. (Zambia or Northern Rhodesia).ti,ab.
271. Botswana/
272. (Botswana or Bechuanaland or Kalahari).ti,ab.
273. Equatorial Guinea/
274. (Equatorial Guinea or Spanish Guinea).ti,ab.
275. Gabon/
276. (Gabon or Gabonese Republic).ti,ab.
277. Mauritius/
278. (Mauritius or Agalega Islands).ti,ab.
279. Namibia/
280. Namibia.ti,ab.
281. South Africa/
282. South Africa.ti,ab.
283. or/1-282 [ALL COUNTRIES DESIGNATED AS LMIC]
284. sexual harassment.ab,ti.
285. 283 and 284
286. remove duplicates from 285

## Appendix 2: Quality assessment of included studies (n=49)

| Study author and year | Research focus on SH (as detailed in the objective) | Clear definition of SH | Clear description of measurement approach/tool for SH | Representativeness of target population to national population | Representativeness of sampling frame | Random sample? | Non-response bias minimal? | SH prevalence included in results | Numerator & denominator clear or appropriate? | Score / 9 | Rating   |
|-----------------------|-----------------------------------------------------|------------------------|-------------------------------------------------------|----------------------------------------------------------------|--------------------------------------|----------------|----------------------------|-----------------------------------|-----------------------------------------------|-----------|----------|
| Luo (1996)            | Y                                                   | Y                      | Y                                                     | N                                                              | Y                                    | N              | Y                          | Y                                 | N                                             | 6         | Moderate |
| Tang, et al (1996)    | Y                                                   | N                      | Y                                                     | N                                                              | N                                    | N              | N                          | Y                                 | Y                                             | 4         | Moderate |
| Mayekiso et al (1997) | Y                                                   | Y                      | Y                                                     | N                                                              | N                                    | N              | N                          | Y                                 | N                                             | 4         | Moderate |
| Shumba et al (2002)   | Y                                                   | Y                      | N                                                     | N                                                              | N                                    | Y              | Y                          | Y                                 | Y                                             | 6         | Moderate |
| Fineran et al (2003)  | Y                                                   | Y                      | Y                                                     | N                                                              | Y                                    | N              | N                          | Y                                 | N                                             | 5         | Moderate |
| Fawole, et al (2005)  | Y                                                   | Y                      | N                                                     | N                                                              | Y                                    | N              | N                          | Y                                 | Y                                             | 5         | Moderate |
| Okoro et al (2005)    | Y                                                   | Y                      | Y                                                     | N                                                              | Y                                    | N              | Y                          | Y                                 | Y                                             | 7         | High     |
| Parish et al (2006)   | Y                                                   | N                      | Y                                                     | Y                                                              | Y                                    | Y              | N                          | Y                                 | N                                             | 6         | Moderate |
| Puri et al (2007)     | Y                                                   | N                      | Y                                                     | N                                                              | Y                                    | Y              | Y                          | Y                                 | N                                             | 6         | Moderate |
| Merkin (2008)         | Y                                                   | Y                      | Y                                                     | N                                                              | Y                                    | Y              | N                          | Y                                 | N                                             | 6         | Moderate |
| Marsh, et al (2009)   | Y                                                   | Y                      | Y                                                     | N                                                              | Y                                    | N              | N                          | Y                                 | Y                                             | 6         | Moderate |
| De Souza et al (2009) | Y                                                   | Y                      | Y                                                     | N                                                              | Y                                    | N              | Y                          | Y                                 | Y                                             | 7         | High     |

| Study author and year     | Research focus on SH (as detailed in the objective) | Clear definition of SH | Clear description of measurement approach/tool for SH | Representativeness of target population to national population | Representativeness of sampling frame | Random sample? | Non-response bias minimal? | SH prevalence included in results | Numerator & denominator clear or appropriate? | Score / 9 | Rating   |
|---------------------------|-----------------------------------------------------|------------------------|-------------------------------------------------------|----------------------------------------------------------------|--------------------------------------|----------------|----------------------------|-----------------------------------|-----------------------------------------------|-----------|----------|
| Owoaje et al (2009)       | Y                                                   | Y                      | Y                                                     | N                                                              | N                                    | N              | Y                          | Y                                 | Y                                             | 6         | Moderate |
| Koehlmoos et al (2009)    | Y                                                   | N                      | N                                                     | N                                                              | Y                                    | Y              | N                          | Y                                 | Y                                             | 5         | Moderate |
| Premadasa et al (2011)    | Y                                                   | Y                      | Y                                                     | N                                                              | N                                    | N              | N                          | Y                                 | Y                                             | 5         | Moderate |
| Owoaje, et al (2011)      | Y                                                   | N                      | Y                                                     | N                                                              | N                                    | N              | Y                          | Y                                 | N                                             | 4         | Moderate |
| Lahsaeizadeh et al (2012) | Y                                                   | Y                      | Y                                                     | N                                                              | Y                                    | N              | N                          | Y                                 | Y                                             | 5         | Moderate |
| Dhlomo et al (2012)       | Y                                                   | Y                      | Y                                                     | N                                                              | Y                                    | N              | N                          | Y                                 | N                                             | 4         | Moderate |
| Hutagalang et al (2012)   | Y                                                   | Y                      | Y                                                     | N                                                              | N                                    | Y              | NP                         | Y                                 | N                                             | 5         | Moderate |
| Norman et al (2012)       | Y                                                   | Y                      | Y                                                     | N                                                              | N                                    | N              | Y                          | Y                                 | N                                             | 6         | Moderate |
| Fernandes et al (2012)    | N                                                   | N                      | N                                                     | Y                                                              | Y                                    | Y              | Y                          | Y                                 | Y                                             | 6         | High     |
| Norman et al (2013)       | Y                                                   | N                      | Y                                                     | N                                                              | N                                    | N              | N                          | Y                                 | N                                             | 3         | Low      |
| de Puisseau et al (2013)  | Y                                                   | Y                      | Y                                                     | N                                                              | Y                                    | N              | N                          | Y                                 | Y                                             | 5         | Moderate |
| Norman et al (2013)       | Y                                                   | N                      | Y                                                     | N                                                              | N                                    | N              | N                          | Y                                 | N                                             | 3         | Low      |
| Haile, et al (2013)       | Y                                                   | N                      | N                                                     | N                                                              | Y                                    | Y              | Y                          | Y                                 | N                                             | 5         | Moderate |

| Study author and year | Research focus on SH (as detailed in the objective) | Clear definition of SH | Clear description of measurement approach/tool for SH | Representativeness of target population to national population | Representativeness of sampling frame | Random sample? | Non-response bias minimal? | SH prevalence included in results | Numerator & denominator clear or appropriate? | Score / 9 | Rating   |
|-----------------------|-----------------------------------------------------|------------------------|-------------------------------------------------------|----------------------------------------------------------------|--------------------------------------|----------------|----------------------------|-----------------------------------|-----------------------------------------------|-----------|----------|
| Park et al (2013)     | N                                                   | N                      | Y                                                     | Y                                                              | Y                                    | Y              | Y                          | Y                                 | Y                                             | 7         | High     |
| Austrian et al (2014) | Y                                                   | N                      | Y                                                     | N                                                              | Y                                    | N              | Y                          | Y                                 | Y                                             | 6         | Moderate |
| Maurya et al (2014)   | Y                                                   | N                      | Y                                                     | N                                                              | N                                    | N              | N                          | N                                 | N                                             | 2         | Low      |
| Mamaru et al (2015)   | Y                                                   | Y                      | Y                                                     | N                                                              | Y                                    | Y              | Y                          | Y                                 | Y                                             | 8         | High     |
| Tobar et al (2015)    | N                                                   | Y                      | Y                                                     | N                                                              | Y                                    | N              | Y                          | Y                                 | N                                             | 5         | Moderate |
| Kunwar et al (2015)   | Y                                                   | Y                      | N                                                     | N                                                              | N                                    | N              | N                          | Y                                 | N                                             | 3         | Low      |
| Vuckovic et al (2016) | Y                                                   | Y                      | N                                                     | Y                                                              | Y                                    | Y              | Y                          | Y                                 | Y                                             | 8         | High     |
| Sahraian et al (2016) | N                                                   | Y                      | Y                                                     | N                                                              | N                                    | N              | N                          | Y                                 | Y                                             | 4         | Moderate |
| Tripathi et al (2016) | N                                                   | N                      | N                                                     | N                                                              | N                                    | N              | N                          | Y                                 | Y                                             | 2         | Low      |
| Zhang, et al (2016)   | Y                                                   | Y                      | Y                                                     | Y                                                              | Y                                    | Y              | Y                          | Y                                 | N                                             | 8         | High     |
| Talboys et al (2017)  | Y                                                   | Y                      | Y                                                     | N                                                              | N                                    | N              | N                          | Y                                 | N                                             | 4         | Moderate |
| Xie et al (2017)      | N                                                   | N                      | N                                                     | Y                                                              | N                                    | N              | Y                          | Y                                 | Y                                             | 4         | Moderate |
| Tripathi et al (2017) | Y                                                   | N                      | N                                                     | N                                                              | N                                    | N              | Y                          | Y                                 | N                                             | 3         | Low      |

| Study author and year | Research focus on SH (as detailed in the objective) | Clear definition of SH | Clear description of measurement approach/tool for SH | Representativeness of target population to national population | Representativeness of sampling frame | Random sample? | Non-response bias minimal? | SH prevalence included in results | Numerator & denominator clear or appropriate? | Score / 9 | Rating   |
|-----------------------|-----------------------------------------------------|------------------------|-------------------------------------------------------|----------------------------------------------------------------|--------------------------------------|----------------|----------------------------|-----------------------------------|-----------------------------------------------|-----------|----------|
| Dar et al (2018)      | N                                                   | N                      | Y                                                     | N                                                              | N                                    | N              | Y                          | Y                                 | N                                             | 3         | Low      |
| Aina et al (2018)     | Y                                                   | Y                      | N                                                     | N                                                              | N                                    | Y              | N                          | Y                                 | N                                             | 3         | Low      |
| Mabetha et al (2018)  | Y                                                   | N                      | Y                                                     | Y                                                              | Y                                    | Y              | Y                          | Y                                 | Y                                             | 8         | High     |
| Ul Haq et al (2018)   | Y                                                   | N                      | Y                                                     | N                                                              | N                                    | N              | N                          | Y                                 | N                                             | 3         | Low      |
| Akoku et al (2019)    | Y                                                   | Y                      | Y                                                     | N                                                              | Y                                    | N              | Y                          | Y                                 | Y                                             | 7         | High     |
| Murshid et al (2019)  | N                                                   | N                      | N                                                     | Y                                                              | Y                                    | Y              | Y                          | Y                                 | N                                             | 5         | Moderate |
| Zhu et al (2019)      | Y                                                   | Y                      | Y                                                     | N                                                              | Y                                    | N              | Y                          | Y                                 | Y                                             | 7         | High     |
| Saberi et al (2019)   | Y                                                   | N                      | Y                                                     | N                                                              | Y                                    | Y              | Y                          | Y                                 | N                                             | 6         | Moderate |
| Gautam, et al (2019)  | Y                                                   | Y                      | N                                                     | N                                                              | N                                    | Y              | Y                          | Y                                 | Y                                             | 6         | Moderate |
| Huang et al (2019)    | Y                                                   | Y                      | Y                                                     | Y                                                              | Y                                    | Y              | Y                          | Y                                 | N                                             | 8         | High     |
| Oni et al (2019)      | Y                                                   | Y                      | N                                                     | N                                                              | N                                    | N              | N                          | Y                                 | N                                             | 3         | Low      |

**Appendix 3: PRISMA Checklist 2020**

| Section and Topic             | Item # | Checklist item                                                                                                                                                                                                                                                                                       | Location where item is reported |
|-------------------------------|--------|------------------------------------------------------------------------------------------------------------------------------------------------------------------------------------------------------------------------------------------------------------------------------------------------------|---------------------------------|
| <b>TITLE</b>                  |        |                                                                                                                                                                                                                                                                                                      |                                 |
| Title                         | 1      | Identify the report as a systematic review.                                                                                                                                                                                                                                                          | Page 1                          |
| <b>ABSTRACT</b>               |        |                                                                                                                                                                                                                                                                                                      |                                 |
| Abstract                      | 2      | See the PRISMA 2020 for Abstracts checklist.                                                                                                                                                                                                                                                         | Pgs 2 and 3                     |
| <b>INTRODUCTION</b>           |        |                                                                                                                                                                                                                                                                                                      |                                 |
| Rationale                     | 3      | Describe the rationale for the review in the context of existing knowledge.                                                                                                                                                                                                                          | Pgs 4-6                         |
| Objectives                    | 4      | Provide an explicit statement of the objective(s) or question(s) the review addresses.                                                                                                                                                                                                               | Pg 6                            |
| <b>METHODS</b>                |        |                                                                                                                                                                                                                                                                                                      |                                 |
| Eligibility criteria          | 5      | Specify the inclusion and exclusion criteria for the review and how studies were grouped for the syntheses.                                                                                                                                                                                          | Pg 7                            |
| Information sources           | 6      | Specify all databases, registers, websites, organisations, reference lists and other sources searched or consulted to identify studies. Specify the date when each source was last searched or consulted.                                                                                            |                                 |
| Search strategy               | 7      | Present the full search strategies for all databases, registers and websites, including any filters and limits used.                                                                                                                                                                                 | Pg 6 and Appendix 1             |
| Selection process             | 8      | Specify the methods used to decide whether a study met the inclusion criteria of the review, including how many reviewers screened each record and each report retrieved, whether they worked independently, and if applicable, details of automation tools used in the process.                     | Pg 7,8 and figure 1             |
| Data collection process       | 9      | Specify the methods used to collect data from reports, including how many reviewers collected data from each report, whether they worked independently, any processes for obtaining or confirming data from study investigators, and if applicable, details of automation tools used in the process. | Pg 7 and 8                      |
| Data items                    | 10a    | List and define all outcomes for which data were sought. Specify whether all results that were compatible with each outcome domain in each study were sought (e.g. for all measures, time points, analyses), and if not, the methods used to decide which results to collect.                        | Pg 8                            |
|                               | 10b    | List and define all other variables for which data were sought (e.g. participant and intervention characteristics, funding sources). Describe any assumptions made about any missing or unclear information.                                                                                         |                                 |
| Study risk of bias assessment | 11     | Specify the methods used to assess risk of bias in the included studies, including details of the tool(s) used, how many reviewers assessed each study and whether they worked independently, and if applicable, details of automation tools used in the process.                                    | Pg 8 and appendix 2             |
| Effect measures               | 12     | Specify for each outcome the effect measure(s) (e.g. risk ratio, mean difference) used in the synthesis or presentation of results.                                                                                                                                                                  | Pg 8 and 9                      |
| Synthesis methods             | 13a    | Describe the processes used to decide which studies were eligible for each synthesis (e.g. tabulating the study intervention characteristics and comparing against the planned groups for each synthesis (item #5)).                                                                                 | Pg 8 and 9                      |
|                               | 13b    | Describe any methods required to prepare the data for presentation or synthesis, such as handling of missing summary statistics, or data conversions.                                                                                                                                                | Pg 8 and 9                      |

| Section and Topic             | Item # | Checklist item                                                                                                                                                                                                                                                                       | Location where item is reported |
|-------------------------------|--------|--------------------------------------------------------------------------------------------------------------------------------------------------------------------------------------------------------------------------------------------------------------------------------------|---------------------------------|
|                               | 13c    | Describe any methods used to tabulate or visually display results of individual studies and syntheses.                                                                                                                                                                               |                                 |
|                               | 13d    | Describe any methods used to synthesize results and provide a rationale for the choice(s). If meta-analysis was performed, describe the model(s), method(s) to identify the presence and extent of statistical heterogeneity, and software package(s) used.                          | Pg 8 and 9                      |
|                               | 13e    | Describe any methods used to explore possible causes of heterogeneity among study results (e.g. subgroup analysis, meta-regression).                                                                                                                                                 |                                 |
|                               | 13f    | Describe any sensitivity analyses conducted to assess robustness of the synthesized results.                                                                                                                                                                                         |                                 |
| Reporting bias assessment     | 14     | Describe any methods used to assess risk of bias due to missing results in a synthesis (arising from reporting biases).                                                                                                                                                              |                                 |
| Certainty assessment          | 15     | Describe any methods used to assess certainty (or confidence) in the body of evidence for an outcome.                                                                                                                                                                                |                                 |
| <b>RESULTS</b>                |        |                                                                                                                                                                                                                                                                                      |                                 |
| Study selection               | 16a    | Describe the results of the search and selection process, from the number of records identified in the search to the number of studies included in the review, ideally using a flow diagram.                                                                                         | Pg 9 and figure 1               |
|                               | 16b    | Cite studies that might appear to meet the inclusion criteria, but which were excluded, and explain why they were excluded.                                                                                                                                                          | Pg 9                            |
| Study characteristics         | 17     | Cite each included study and present its characteristics.                                                                                                                                                                                                                            | Pg 9-13                         |
| Risk of bias in studies       | 18     | Present assessments of risk of bias for each included study.                                                                                                                                                                                                                         | Pg 17-20                        |
| Results of individual studies | 19     | For all outcomes, present, for each study: (a) summary statistics for each group (where appropriate) and (b) an effect estimate and its precision (e.g. confidence/credible interval), ideally using structured tables or plots.                                                     | Pgs 19=21                       |
| Results of syntheses          | 20a    | For each synthesis, briefly summarise the characteristics and risk of bias among contributing studies.                                                                                                                                                                               |                                 |
|                               | 20b    | Present results of all statistical syntheses conducted. If meta-analysis was done, present for each the summary estimate and its precision (e.g. confidence/credible interval) and measures of statistical heterogeneity. If comparing groups, describe the direction of the effect. | Pgs 19-21 and figure 2          |
|                               | 20c    | Present results of all investigations of possible causes of heterogeneity among study results.                                                                                                                                                                                       | Pg 20                           |
|                               | 20d    | Present results of all sensitivity analyses conducted to assess the robustness of the synthesized results.                                                                                                                                                                           |                                 |
| Reporting biases              | 21     | Present assessments of risk of bias due to missing results (arising from reporting biases) for each synthesis assessed.                                                                                                                                                              |                                 |
| Certainty of evidence         | 22     | Present assessments of certainty (or confidence) in the body of evidence for each outcome assessed.                                                                                                                                                                                  |                                 |
| <b>DISCUSSION</b>             |        |                                                                                                                                                                                                                                                                                      |                                 |
| Discussion                    | 23a    | Provide a general interpretation of the results in the context of other evidence.                                                                                                                                                                                                    | Pgs 21-24                       |
|                               | 23b    | Discuss any limitations of the evidence included in the review.                                                                                                                                                                                                                      | Pg 24                           |
|                               | 23c    | Discuss any limitations of the review processes used.                                                                                                                                                                                                                                | Pg 24                           |

| Section and Topic                              | Item # | Checklist item                                                                                                                                                                                                                             | Location where item is reported |
|------------------------------------------------|--------|--------------------------------------------------------------------------------------------------------------------------------------------------------------------------------------------------------------------------------------------|---------------------------------|
|                                                | 23d    | Discuss implications of the results for practice, policy, and future research.                                                                                                                                                             | Pg 25-26                        |
| <b>OTHER INFORMATION</b>                       |        |                                                                                                                                                                                                                                            |                                 |
| Registration and protocol                      | 24a    | Provide registration information for the review, including register name and registration number, or state that the review was not registered.                                                                                             | Pg 6                            |
|                                                | 24b    | Indicate where the review protocol can be accessed, or state that a protocol was not prepared.                                                                                                                                             | Pg 6                            |
|                                                | 24c    | Describe and explain any amendments to information provided at registration or in the protocol.                                                                                                                                            |                                 |
| Support                                        | 25     | Describe sources of financial or non-financial support for the review, and the role of the funders or sponsors in the review.                                                                                                              | Pg 27                           |
| Competing interests                            | 26     | Declare any competing interests of review authors.                                                                                                                                                                                         | Pg 27                           |
| Availability of data, code and other materials | 27     | Report which of the following are publicly available and where they can be found: template data collection forms; data extracted from included studies; data used for all analyses; analytic code; any other materials used in the review. |                                 |

**Appendix 4: Definitions of sexual harassment by study.**

| Study author          | Definition of sexual harassment (if included)                                                                                                                                                                                                                                                                                                                                                                                                                                                                                                                                                                                                                                                                                                                    |
|-----------------------|------------------------------------------------------------------------------------------------------------------------------------------------------------------------------------------------------------------------------------------------------------------------------------------------------------------------------------------------------------------------------------------------------------------------------------------------------------------------------------------------------------------------------------------------------------------------------------------------------------------------------------------------------------------------------------------------------------------------------------------------------------------|
| Akoku et al 2019      | Sexual harassment is any unwelcome sexual advance, unwelcome request for sexual favour, verbal or physical conduct or gesture of a sexual nature, or any other behaviour of a sexual nature that might reasonably be expected or be perceived to cause offence, humiliation or intimidation to the person (adapted from UN Women).                                                                                                                                                                                                                                                                                                                                                                                                                               |
| Xie et al 2017        | No definition provided.                                                                                                                                                                                                                                                                                                                                                                                                                                                                                                                                                                                                                                                                                                                                          |
| Sahraian et al 2016   | Sexual harassment was defined as any unwanted or unwelcome behaviour of a sexual nature such as standing too close, staring and focusing more than usual, undesirable sexual words and questions, insisting on a private invitation and direct sexual offers that are offensive to the person involved and that cause the person to feel vulnerable or embarrassed (adapted from the WHO definition).                                                                                                                                                                                                                                                                                                                                                            |
| Tripathi et al (2016) | No definition provided                                                                                                                                                                                                                                                                                                                                                                                                                                                                                                                                                                                                                                                                                                                                           |
| Mamaru et al 2015     | Sexual harassment is commonly defined as unwanted and unwelcome sexual behaviour in a work or educational setting affecting both physical and psychological well-being of a person. It could be evident in three different ways: verbal, physical and nonverbal forms                                                                                                                                                                                                                                                                                                                                                                                                                                                                                            |
| Fernandes (2012)      | No definition provided                                                                                                                                                                                                                                                                                                                                                                                                                                                                                                                                                                                                                                                                                                                                           |
| Norman et al (2013)   | No definition provided                                                                                                                                                                                                                                                                                                                                                                                                                                                                                                                                                                                                                                                                                                                                           |
| Norman et al (2012)   | The unwanted sex-related behaviour at work that is appraised by the recipient as offensive, exceeding her resources, or threatening well-being                                                                                                                                                                                                                                                                                                                                                                                                                                                                                                                                                                                                                   |
| Owoaje (2009)         | Unwelcome sexual advances, requests for sexual favours, and other verbal or physical conduct of a sexual nature, constitute sexual harassment. An act/conduct is considered to constitute sexual harassment when any one of the following is true: submission to such conduct is made either explicitly or implicitly a term or condition of a person's employment or academic advancement; submission to or rejection of such conduct by an individual is used as the basis for employment decisions or academic decisions affecting the person and such conduct has the purpose or effect of unreasonably interfering with a person's work or academic performance or creating an intimidating, hostile, or offensive working, learning, or social environment |
| Koehlmoos (2009)      | No definition provided                                                                                                                                                                                                                                                                                                                                                                                                                                                                                                                                                                                                                                                                                                                                           |
| Tobar et al 2015      | Fitzgerald et al 1997 definition: a behavioural construct consisting of three dimensions: (i) general harassment – insulting verbal and nonverbal behaviours conveying derogatory, hostile, or degrading attitude toward women; (ii) unwanted sexual attention – verbal and nonverbal behaviours that are offensive, unwanted, and unreciprocated; (iii) sexual coercion – behaviours using bribes or threats contingent upon sexual cooperation. Furthermore, a harasser may be male or female, and harassment is not limited to men harassing women, although this is the most common                                                                                                                                                                          |
| Parish et al (2006)   | No definition provided                                                                                                                                                                                                                                                                                                                                                                                                                                                                                                                                                                                                                                                                                                                                           |
| Murshid et al (2019)  | No definition provided                                                                                                                                                                                                                                                                                                                                                                                                                                                                                                                                                                                                                                                                                                                                           |

| Study author                 | Definition of sexual harassment (if included)                                                                                                                                                                                                                                                                                                                                                                                                                                                                                                                                                                       |
|------------------------------|---------------------------------------------------------------------------------------------------------------------------------------------------------------------------------------------------------------------------------------------------------------------------------------------------------------------------------------------------------------------------------------------------------------------------------------------------------------------------------------------------------------------------------------------------------------------------------------------------------------------|
| Zhu et al (2019)             | Workplace sexual harassment (WSH) refers to any form of unwelcome conduct of a sexual nature (verbal, non-verbal or physical) that is perceived by the recipient as hostile, humiliating or threatening his/her well-being (Fitzgerald, 1997)                                                                                                                                                                                                                                                                                                                                                                       |
| Aina et al (2018)            | An unwanted conduct with sexual undertones if it occurs or which is persistent and which demeans, humiliates or creates a hostile and intimidating environment or is calculated to induce submission by actual or threatened adverse consequences and includes any one or more or all of the following unwelcome acts or behaviour (whether directly or by implication), namely; -<br>(a) Any unwelcome physical, verbal or non-verbal conduct of sexual nature;<br>(b) demand or request for sexual favours; (c) making sexually coloured remarks<br>(d) physical contact and advances; or (e) showing pornography |
| Tripathi et al (2017)        | Definition is not clear, but recognition that a range of acts can come under its purview (from passing comments amongst a group of friends about a girl, to a sexual assault) but also because of differences in the perception of actions as sexual harassment or not, especially where no physical contact is involved.                                                                                                                                                                                                                                                                                           |
| Vuckovic et al (2016)        | Authors say that sexual harassment is considered part of gender-based violence. Draw on the International Labour Organization (2010) definition. Highlights two forms of sexual harassment specific to the workplace: when a job benefit is made conditional on the victim acceding to demands to engage in some form of sexual behaviour; and hostile working environment in which the conduct creates conditions that are intimidating or humiliating for the victim.                                                                                                                                             |
| Talboys et al (2017)         | Sexual harassment involves nonverbal, verbal, physical, or visual sexual attention, intimidation, or coercion that is unwelcome and unwanted and often has a negative impact on the psychosocial health of the victim.                                                                                                                                                                                                                                                                                                                                                                                              |
| Austrian (2014)              | No definition provided                                                                                                                                                                                                                                                                                                                                                                                                                                                                                                                                                                                              |
| Maurya (2014)                | No definition provided                                                                                                                                                                                                                                                                                                                                                                                                                                                                                                                                                                                              |
| Norman et al (2013)          | No definition provided                                                                                                                                                                                                                                                                                                                                                                                                                                                                                                                                                                                              |
| de Puisseau & Roessel (2013) | In line with the legal definition and also according to the conceptualisations by Fitzgerald, Gelfand, and Drasgow (1995), they refer to sexual harassment as including general harassment, unwanted sexual attention, and sexual coercion.                                                                                                                                                                                                                                                                                                                                                                         |
| Lahsaeizadeh (2012)          | Sexual harassment'' is a kind of gender discrimination that women in different societies experience in various forms and restricts their liberty. Bowman (1993: 520) suggests that the liberty of women is substantially limited by street harassment, which reduces their physical and geographical mobility, and often prevents them from appearing alone in public places.                                                                                                                                                                                                                                       |
| Dhlomo et al (2012)          | Fitzgerald et al. (1997) proposed a tripartite model of sexual harassment that includes three behaviours: gender harassment, unwanted sexual attention and sexual assault and coercion. These occur mostly with the hostile environment form of sexual demands on another person.                                                                                                                                                                                                                                                                                                                                   |

| Study author           | Definition of sexual harassment (if included)                                                                                                                                                                                                                                                                                                                                                                                                                                                                                                                                                                                      |
|------------------------|------------------------------------------------------------------------------------------------------------------------------------------------------------------------------------------------------------------------------------------------------------------------------------------------------------------------------------------------------------------------------------------------------------------------------------------------------------------------------------------------------------------------------------------------------------------------------------------------------------------------------------|
| Premadasa et al (2011) | Unwanted sexual advances, requests for sexual favours or other verbal or physical conduct of a sexual nature in a setting in which noncompliance, refusal or protest could have a negative effect on negative standing (e.g., marks). Examples include: being stared or leered at, ogled; unwelcome remarks, jokes, innuendo, or taunting about a person's body, attire, age or marital status; Display of pornographic, sexually offensive or derogatory pictures; unnecessary physical contact such as touching, pinching and patting; sexual intimacy with or without actual intercourse. (Moscarello R et al (1994)            |
| De Souza et al(2009)   | Unwanted sex-related behaviour at work that is appraised by the recipient as offensive, exceeding her resources, or threatening her well-being (Fitzgerald, Swan, & Magley, 1997, p. 15)                                                                                                                                                                                                                                                                                                                                                                                                                                           |
| Merkin (2008)          | Sexual harassment is defined as behaviour that is unwelcome and of a sexual nature.                                                                                                                                                                                                                                                                                                                                                                                                                                                                                                                                                |
| Puri et al (2007)      | No definition provided                                                                                                                                                                                                                                                                                                                                                                                                                                                                                                                                                                                                             |
| Fawole, et al (2005)   | Sexual harassment - unwanted body contact, sending apprentices on dates with male friends, taking to parties                                                                                                                                                                                                                                                                                                                                                                                                                                                                                                                       |
| Fineran et al (2003)   | Unwanted or unwelcome behaviours, such as making sexual comments, jokes, gestures or looks, showing sexual pictures, photographs, illustrations, messages or notes, writing sexual messages or graffiti on bathroom walls or locker rooms; spreading sexual rumours; calling someone gay or lesbian in a malicious manner; touching, grabbing, or pinching in a sexual way; pulling at clothing in a sexual way; intentionally brushing against someone in a sexual way; pulling clothing off or down; blocking or cornering in a sexual way; and, forcing a kiss, or forcing other unwelcome sexual behaviour other than kissing. |
| Shumba et al (2002)    | Any unwanted, unsolicited and/or repeated verbal or sexual advances, sexually derogatory statements or sexually discriminatory remarks made by a member of the University community in respect of another member of the University community, whether in or outside the University, which are offensive or objectionable to the recipient, or which cause the recipient discomfort or humiliation, or which the recipient believes interfere with the performance of his or her job or study, undermine job security or prospects or create a threatening or intimidating work or study environment.                               |
| Mayekiso et al (1997)  | Sexual harassment means unwanted conduct of a sexual nature or conduct based on sex which is offensive to the recipient                                                                                                                                                                                                                                                                                                                                                                                                                                                                                                            |
| Saberi et al (2019)    | No definition provided                                                                                                                                                                                                                                                                                                                                                                                                                                                                                                                                                                                                             |
| Dar et al (2018)       | No definition provided                                                                                                                                                                                                                                                                                                                                                                                                                                                                                                                                                                                                             |
| Gautam et al (2019)    | Sexual harassment is an action within men and women, which is related to unwelcome behaviour on sex. It is characterized by a wide range of offensive manners including teasing, staring, winking, groping, pinching, sexual comments, telling jokes of a sexual nature, spreading sexual rumours, displaying porn videos, drawing pictures of a sexual nature, and squeezing or touching the private organs of women.                                                                                                                                                                                                             |
| Huang et al (2019)     | Sexual harassment is unwanted and unwelcome sexual behaviour which interferes with your life. Sexual harassment is not behaviours that you like or want (for example wanted kissing, touching or flirting)                                                                                                                                                                                                                                                                                                                                                                                                                         |

| Study author            | Definition of sexual harassment (if included)                                                                                                                                                                                                                                                                                                                                                                                                                               |
|-------------------------|-----------------------------------------------------------------------------------------------------------------------------------------------------------------------------------------------------------------------------------------------------------------------------------------------------------------------------------------------------------------------------------------------------------------------------------------------------------------------------|
| Oni et al (2019)        | Sexual harassment refers to as persistent, unsolicited, and unwelcomed sexual advances which could be visual, physical, verbal and non-verbal gestures and it is seen as a disease of present-day learning institutions.                                                                                                                                                                                                                                                    |
| UI Haq et al (2018)     | No definition provided                                                                                                                                                                                                                                                                                                                                                                                                                                                      |
| Mabetha et al (2018)    | No definition provided                                                                                                                                                                                                                                                                                                                                                                                                                                                      |
| Zhang, et al (2016)     | Sexual harassment (unwelcome sexual advances, requests for sexual favours, and other verbal or physical harassment of a sexual nature).                                                                                                                                                                                                                                                                                                                                     |
| Kunwar et al (2015)     | ILO (2005) Unwelcome sexual advances or verbal or physical conduct of a sexual nature which has the purpose or effect of unreasonably interfering with the individual's work performance or creating an intimidating, hostile, abusive or offensive working environment                                                                                                                                                                                                     |
| Haile, et al (2013)     | No definition provided                                                                                                                                                                                                                                                                                                                                                                                                                                                      |
| Owoaje, et al (2011)    | No definition provided                                                                                                                                                                                                                                                                                                                                                                                                                                                      |
| Marsh, et al (2009)     | Sexual harassment is understood as a collection of verbal and physical actions, including intimidation, bribery and threats of sexual nature. Unwanted sexual advances may be subtle as innuendo and patronisation or as overt as blatant sexual comments and advances.                                                                                                                                                                                                     |
| Okoro et al (2005)      | The United States Equal Employment Opportunity Commission (EEOC) defines sexual harassment as "unwelcome sexual advances, requests for sexual favours, and other verbal or physical conduct of a sexual nature". Sexual harassment has also been defined as a continuum of behaviours, with physical sexual assault at one extreme and non-verbal sexually suggestive behaviour at the other extreme.                                                                       |
| Luo 1996                | Sexual harassment refers to any unwanted/unwelcome sexual attention and advances considered intrusive, offensive or harassing by the recipient. This includes (a) unwelcome sexual jokes or remarks; (b) unwelcome sexual materials or gestures; (c) unwelcome deliberate touching or physical closeness; (d) unwelcome pressure for a date; (e) verbal coercion for sexual activities; and (f) physical coercion for sexual activities, for example rape or attempted rape |
| Tang, et al (1996)      | No definition provided                                                                                                                                                                                                                                                                                                                                                                                                                                                      |
| Hutagalang et al (2012) | Sexual harassment is generally recognized as encompassing all forms of unwanted conduct of a sexual nature, whether verbal or physical, the Malaysian Code of Practise specifically defines sexual harassment as any unwanted conduct of a sexual nature that may be perceived by an individual (a) as a condition on one's employment, (b) as an offence or humiliation, or (c) as a threat to one's well-being.                                                           |

## Appendix 5: Description of included studies

| First author, year | Location, Country | Study setting | Study sample                                                        | Study design/sample size                                | Sexual Harassment   |                                                                                                                                                                                                                                                                                                                         |                  |                                                                                                                                                                                                                                                                                                                                 |                                        |                                                                                                                                        | Outcome measured |
|--------------------|-------------------|---------------|---------------------------------------------------------------------|---------------------------------------------------------|---------------------|-------------------------------------------------------------------------------------------------------------------------------------------------------------------------------------------------------------------------------------------------------------------------------------------------------------------------|------------------|---------------------------------------------------------------------------------------------------------------------------------------------------------------------------------------------------------------------------------------------------------------------------------------------------------------------------------|----------------------------------------|----------------------------------------------------------------------------------------------------------------------------------------|------------------|
|                    |                   |               |                                                                     |                                                         | Definition included | Measurement approach                                                                                                                                                                                                                                                                                                    | Reporting period | Prevalence estimates (%)                                                                                                                                                                                                                                                                                                        | Frequency of acts asked (if available) | Main perpetrator                                                                                                                       |                  |
| Luo (1996)         | Taipei, Taiwan    | Workplace     | Male and female workers across different occupational categories    | Cross-sectional survey (n=927)                          | yes                 | Definition was first read out. Participants were asked to report the most severe form of sexual harassment he/she ever experienced in a work related situation.                                                                                                                                                         | Ever             | 25% of sample experienced some form of sexual harassment in the workplace.<br><br>Females almost three times (36% 177/493) more likely than male workers (13% (51/415) to report having experienced unwanted/unwelcome sexual attention or advances in work related situations.                                                 | Not asked                              | Status and sex of harasser asked.<br><br>More than half of victims in the sample reported co-workers particularly of the opposite sex. | Not applicable   |
| Tang et al (1996)  | Hong Kong         | Educational   | Male and female Chinese students at a local university in Hong Kong | Cross-sectional survey (n=859), 368 males, 491 females. | No                  | Sexual harassment scale: a 16-item behavioural scale to assess students' definition, awareness and experiences of sexual harassment by opposite sex faculty members or peers.<br><br><i>Faculty-student sexual harassment scale</i> consists of three items: sexual coercion, physical seduction and gender harassment. | Not specified    | <i>Faculty-student harassment:</i> Females reported experiencing more incidents than males. Women: ~12% reported teachers' misogynistic comments, 5% of women reported sexist comments about their body, unwanted pressure for dates and sexually suggestive looks from their teachers.<br><i>Peer sexual harassment:</i> Women | Not asked                              | Faculty-student and peer sexual harassment                                                                                             | Not applicable   |

|                       |                        |             |                                     |                                |     |                                                                                                                                                                                                                                                                                                                                                                                                                |               |                                                                                                                                                                                                                                                                                             |           |                                  |                |
|-----------------------|------------------------|-------------|-------------------------------------|--------------------------------|-----|----------------------------------------------------------------------------------------------------------------------------------------------------------------------------------------------------------------------------------------------------------------------------------------------------------------------------------------------------------------------------------------------------------------|---------------|---------------------------------------------------------------------------------------------------------------------------------------------------------------------------------------------------------------------------------------------------------------------------------------------|-----------|----------------------------------|----------------|
|                       |                        |             |                                     |                                |     | <p><i>Peer sexual harassment</i> consists of four items: sexual coercion, physical seduction, non-physical seduction and gender harassment.</p> <p>Sum total of yes responses represents index. Low index indicates low level experience of harassment.</p>                                                                                                                                                    |               | <p>twice as much being sexual harassed as men.</p> <p><i>Men:</i> 13% sexist remarks and 5-6% experienced both physical and non-physical seductive behaviours.</p> <p><i>Women:</i> 20-26% reported experiencing various forms of physical seductive behaviours, and gender harassment.</p> |           |                                  |                |
| Mayekiso et al (1997) | Transkei, South Africa | Educational | Male and female university students | Cross-sectional survey (n=827) | Yes | Modified version of the Sexual Harassment Questionnaire (Braine et al, 1995). The questionnaire consists of 11 specific categories of behaviour that may constitute sexual harassment, ranging from unwelcome touching, unwanted sexual remarks, unwanted sexual advances, sexually loaded noises or gestures, unwanted letter, pressure for dates and sexual favours despite refusals, and rape or date rape. | Not specified | Females: 43%-66%<br>Males: 33%-55%                                                                                                                                                                                                                                                          | Not asked | Males/females and staff/students | Not applicable |
| Shumba et al (2002)   | Zimbabwe               | Educational | First and third year students from  | Cross-sectional survey (n=83)  | Yes | 30-item 'Sexual Harassment Questionnaire' was                                                                                                                                                                                                                                                                                                                                                                  | School year.  | 66% (40/61) females indicated they have been asked for sexual                                                                                                                                                                                                                               | Not asked | Lecturers                        | Not applicable |



|                      |                 |           |                                                                                             |                                                      |                 |                                                                                                                                                                                                                                                                                                                                                                                                                             |         |                                                                                                                                                                                                                          |            |                                                                                                               |                |
|----------------------|-----------------|-----------|---------------------------------------------------------------------------------------------|------------------------------------------------------|-----------------|-----------------------------------------------------------------------------------------------------------------------------------------------------------------------------------------------------------------------------------------------------------------------------------------------------------------------------------------------------------------------------------------------------------------------------|---------|--------------------------------------------------------------------------------------------------------------------------------------------------------------------------------------------------------------------------|------------|---------------------------------------------------------------------------------------------------------------|----------------|
|                      |                 |           |                                                                                             |                                                      |                 | messages/graffiti about you on bathroom walls, in locker rooms; 4) spread sexual rumours about you; 5) said you were gay or lesbian; 6) spied on you as you dressed or showered at school; 7) flashed or 'mooned' you?; 8) touched, grabbed or pinched you in a sexual way; 10) intentionally brushed against you in a sexual way; 11) pulled your clothing off or down; 12) forced you to do something other than kissing. |         |                                                                                                                                                                                                                          |            |                                                                                                               |                |
| Fawole, et al (2005) | Ibadan, Nigeria | Workplace | Female apprentices receiving vocational training (e.g., tailors, hairdressers) at workshops | Baseline and follow-up survey after training (n=350) | Basic, but yes. | Sexual harassment measured separately, but grouped as part of sexual forms of violence (e.g., rape). Although actual measure used is unclear.<br><br>Questions were on acts of harassment: touching parts of the body, taking on dates, making sexual advances or sexually suggestive remarks.                                                                                                                              | Unclear | Baseline: 22.9% (80/359) of females. Endline: 19.7% of females (40/350).<br><br>The types of harassment consisted of touching parts of the body, taking on dates, making sexual advances or sexually suggestive remarks. | Not asked. | Persons well know to the girl, such as male partners at baseline and close associate or neighbour at endline. | Not applicable |

|                          |                     |           |                                             |                                                         |     |                                                                                                                                                                                                                                                                                                                                                                                      |                |                                                                                                                                                                                                                                                |           |                                                                                                                                                                                                                        |                |
|--------------------------|---------------------|-----------|---------------------------------------------|---------------------------------------------------------|-----|--------------------------------------------------------------------------------------------------------------------------------------------------------------------------------------------------------------------------------------------------------------------------------------------------------------------------------------------------------------------------------------|----------------|------------------------------------------------------------------------------------------------------------------------------------------------------------------------------------------------------------------------------------------------|-----------|------------------------------------------------------------------------------------------------------------------------------------------------------------------------------------------------------------------------|----------------|
| Okoro & Obozokhai (2005) | Benin city, Nigeria | Community | Out of school teenagers (males and females) | Cross-sectional survey (n=650 - 293 males, 357 females) | Yes | Adopted from the American Association of University Women (AAUW)'s Educational Foundation questions. Sexual harassment experiences were in four categories: verbal intimidation/threats; physical unwanted touch of private areas, hand holding or kiss; deceit tending towards attempted sexual demand or activity; and actual sexual activity (intercourse), by coercion or force. | Ever           | Any form of harassment: 83% (296/357) of females and 62% (182/293) of males.<br><br>Verbal assaults more common in females (83% compared to 21% males) as was unwanted touching of private parts (parts 71% for the females and 43% of males). | Not asked | Not asked                                                                                                                                                                                                              | Not applicable |
| Parish et al (2006)      | Mainland China      | Community | General adult population                    | Population based national sample (n=3821)               | No  | Two sexual harassment questions included in the Chinese Health and Family Life Survey (CHFLS) :<br><u>Physical harassment</u> : "In the past 12 months, did someone sexually harass you (e.g., touch you, act indecently towards you, or take advantage of you with a sexual intent)?"<br><u>Verbal harassment</u> :                                                                 | Past 12 months | Nationwide sample:<br>Females: 12.5%<br>Males: 7.8%<br><br>Urban areas:<br>All females: 15.1%<br>Males: 6.4%<br>Younger females (20-45y): 19.2%                                                                                                | Not asked | Co-worker, neighbor, or other peer (7.0%) was the most common.<br><br>Asked about different categories: 1) older (supervisor, teacher, senior); 2) colleague, schoolmate etc 3) boyfriend 4) family member 5) stranger | Not applicable |

|                   |                  |           |                                                        |                                |    |                                                                                                                                                                                                                                                                                                                                                                                                                                                                                                                                                                                  |      |                                                                                                                                                                                                                                             |                                   |                                                                                                                 |                |
|-------------------|------------------|-----------|--------------------------------------------------------|--------------------------------|----|----------------------------------------------------------------------------------------------------------------------------------------------------------------------------------------------------------------------------------------------------------------------------------------------------------------------------------------------------------------------------------------------------------------------------------------------------------------------------------------------------------------------------------------------------------------------------------|------|---------------------------------------------------------------------------------------------------------------------------------------------------------------------------------------------------------------------------------------------|-----------------------------------|-----------------------------------------------------------------------------------------------------------------|----------------|
|                   |                  |           |                                                        |                                |    | In the past 12 months, has anyone said anything sexually offensive to you?"<br>Coding was a combined measure as numbers were small to separate them.                                                                                                                                                                                                                                                                                                                                                                                                                             |      |                                                                                                                                                                                                                                             |                                   |                                                                                                                 |                |
| Puri et al (2007) | Kathmandu, Nepal | Workplace | Female migrant workers in carpet and garment factories | Cross-sectional survey (n=550) | No | Questionnaire format based on WHO's adolescents sexual behaviour questionnaire. Questions to measure sexual harassment:<br>1) Young boys/girls are sometimes touched on the breast or some other parts of the body when they do not want it, by a stranger, relative or an older person.<br>a)Has this ever happened to your friends?<br>b)Has this ever happened to you?<br>2) Young boys/girls are sometimes forced to have sexual intercourse against their will by a stranger, relative or an older person, teacher, owner etc.<br>a)Has this ever happened to your friends? | Ever | Respondent ever experienced sexual harassment (12.2%)<br><br>Aware of friends who experienced sexual harassment (27.6%)<br><br>Aware of friends who have been raped/coerced sex (11.3%)<br><br>Respondent has been raped/coerced sex (2.2%) | Kept open ("when did it happen?") | Coworkers, boyfriends, employers, and relatives.<br><br>Appears to be mostly co-workers or boyfriends/husbands. | Not applicable |

|                     |                                          |             |                                                                                                                                 |                                                                                                                               |     | b)Has this ever happened to you?<br>IF YES "When did it happen?" "If yes, then please say by whom?"                                                                                                                                                          |                |                                                                                                                                                                                |                                                                                                              |                                                                                       |                |
|---------------------|------------------------------------------|-------------|---------------------------------------------------------------------------------------------------------------------------------|-------------------------------------------------------------------------------------------------------------------------------|-----|--------------------------------------------------------------------------------------------------------------------------------------------------------------------------------------------------------------------------------------------------------------|----------------|--------------------------------------------------------------------------------------------------------------------------------------------------------------------------------|--------------------------------------------------------------------------------------------------------------|---------------------------------------------------------------------------------------|----------------|
| Merkin (2008)       | Latin America (Argentina, Brazil, Chile) | Workplace   | Employed female and male workers part of International Labour Organisation (ILO)'s InFocus Programme on Socio-Economic Security | Cross-sectional survey (ILO's People's Social Survey (PSS). (Total N=81 98, Argentina-n=2800, Brazil-n=4000, Chile - n=1 180) | Yes | Survey used a global measure similar to the Navy Equal Opportunity/Sexual Harassment Survey (NEOSH).<br>Direct question: During the past 2 years, have you experienced sexual harassment at work or school?                                                  | Past 2 years   | Chile (8.7%), Brazil (4.8%), Argentina (3.5%)                                                                                                                                  | For each of the behaviours: asked never, once, once a month or less, 2-4 times a month, once a week or more. | Asked whether: immediate supervisor, higher level supervisor, co-worker, subordinate. | Not applicable |
| Owoaje et al (2009) | Ibadan, Nigeria                          | Educational | Female graduates in higher learning institutions                                                                                | Cross-sectional survey (n=398)                                                                                                | Yes | Modified version of the American Association of University Women (AAUW) Educational Foundation questionnaire on sexual harassment in college campuses.<br><br>Sexual harassment experiences were asked by four categories:<br>- verbal intimidation/threats; | Past 12 months | Overall prevalence: 69.8% (278/398);<br><br>65.3% (260/398) experienced non-physical sexual harassment<br><br>48.2% (192/398) experienced physical types of sexual harassment. | Not asked                                                                                                    | Male classmates (61.9%) and lecturers (59.7%)                                         | Not applicable |

---

|                        |                   |                         |                              |                                                |    |                                                                                                                                                                                                                                                                                                                                          |                                           |                                                                                                                                        |                                    |                     |                |
|------------------------|-------------------|-------------------------|------------------------------|------------------------------------------------|----|------------------------------------------------------------------------------------------------------------------------------------------------------------------------------------------------------------------------------------------------------------------------------------------------------------------------------------------|-------------------------------------------|----------------------------------------------------------------------------------------------------------------------------------------|------------------------------------|---------------------|----------------|
|                        |                   |                         |                              |                                                |    | - physical unwanted touch of private areas, hand holding or kiss;<br>- deceit tending towards attempted sexual demand or activity; and<br>- actual sexual activity (intercourse), by coercion or force.                                                                                                                                  |                                           |                                                                                                                                        |                                    |                     |                |
| Koehlmoos et al (2009) | Dhaka, Bangladesh | Street and public place | Homeless adult men and women | Community based cross-sectional survey (n=896) | No | Only asked to female respondent. First asked if they were approached for unwanted physical contact or sexually propositioned while walking or lying in public spaces.<br><br>Victims also asked to describe types of harassment such as: unwanted physical contact, unwanted sexual advances, touching, leering, rude gestures and rape. | During the time period of being homeless. | 62.9% (282/448) of women experienced some form of unwanted physical contact or sexual proposition during their time as homeless women. | 74% (208/228) reported frequently. | Husbands/boyfriends | Not applicable |

---

|                       |                      |           |                                                        |                                |     |                                                                                                                                                                                                                                                                                                        |                |                                                                                                                                                                                                                                                                                                                                                                                                                                           |                                                                                                                                                                                                                                                                                                                                    |                                          |                |
|-----------------------|----------------------|-----------|--------------------------------------------------------|--------------------------------|-----|--------------------------------------------------------------------------------------------------------------------------------------------------------------------------------------------------------------------------------------------------------------------------------------------------------|----------------|-------------------------------------------------------------------------------------------------------------------------------------------------------------------------------------------------------------------------------------------------------------------------------------------------------------------------------------------------------------------------------------------------------------------------------------------|------------------------------------------------------------------------------------------------------------------------------------------------------------------------------------------------------------------------------------------------------------------------------------------------------------------------------------|------------------------------------------|----------------|
| De Souza et al (2009) | Porto Alegre, Brazil | Workplace | Female domestic workers (16-60 years)                  | Cross-sectional survey (n=376) | Yes | Shortened version of the Sexual Experiences Questionnaire (SEQ) (Stark et al 2002) - asks about 16 different behaviours initiated by either men or women at the workplace based on 5 categories: sexist hostility, sexual hostility, unwanted sexual attention, sexual coercion and gender harassment. | Past 12 months | 25% (94/376) reported some form of past year sexual harassment.<br><br>Of these, 68% (n = 64/94) reported sexist hostility, followed by 59% (55/94) sexual hostility, 46% unwanted sexual attention (n = 43/94), 30% sexual coercion (n = 28/94).<br><br>About 54% (n = 51/94) reported having experienced two or more types of sexual harassment, with 17% (n = 16/94) reporting having experienced all four types of sexual harassment. | Five point scale: 1 = never, 2 = once or twice, 3 = sometimes, 4 = often, and 5 = many times. Next, if participants had experienced a sexually harassing behavior at least once, they were asked how bothersome it was on a 5-point scale. Higher scores represented higher reported levels of feeling bothered by such incidents. | Not asked, but sex of perpetrator asked. | Not applicable |
| Marsh et al (2009)    | Awassa, Ethiopia     | Workplace | Female administrative and faculty staff from colleges. | Cross-sectional survey (n=387) | Yes | <u>First asked five questions:</u><br>1) Made you feel like you might get some reward if you engaged in sexual behaviour (no/yes)<br>2) Made you feel like you might get punished in some way if you weren't sexually cooperative;<br>3) Made unwanted                                                 | Past 12 months | 46.8% (181/387) of sample reported experiencing at least one type of sexual harassment.<br><br>Of this sample (n=181), only 8% (31 /181) believed they had been sexually harassed at their workplace                                                                                                                                                                                                                                      | Not asked                                                                                                                                                                                                                                                                                                                          | Not asked                                | Depressio      |

|                        |                       |             |                                                  |                               |     |                                                                                                                                                                                                                                                                                                                                                                                                                               |                           |                                                                                                                                                                                                                                                                                |            |                                                   |                |
|------------------------|-----------------------|-------------|--------------------------------------------------|-------------------------------|-----|-------------------------------------------------------------------------------------------------------------------------------------------------------------------------------------------------------------------------------------------------------------------------------------------------------------------------------------------------------------------------------------------------------------------------------|---------------------------|--------------------------------------------------------------------------------------------------------------------------------------------------------------------------------------------------------------------------------------------------------------------------------|------------|---------------------------------------------------|----------------|
|                        |                       |             |                                                  |                               |     | suggestions about or references to sexual activity;<br>4) On the job, have you experienced unwanted physical contact, included sexual contact?<br>5) Have you felt mistreated at work because of your gender?<br>and <u>one direct single item question:</u><br>Do you believe you have been sexually harassed at work?<br>Summary score computed by adding up items with at least one experience of sexual harassment (0-5). |                           |                                                                                                                                                                                                                                                                                |            |                                                   |                |
| Premadasa et al (2011) | Peradeniya, Sri Lanka | Educational | Dental undergraduate students (male and females) | Cross-sectional survey (n=65) | Yes | Adapted from Moscarello et al (1994)'s survey instrument. Students were asked about six types of sexual 'mistreatment' as they worded it on staring; unwelcome comments; being shown pornographic or sexually offensive pictures; unwanted sexual advances and unnecessary touching; sexual                                                                                                                                   | Since being at University | Any type of sexual harassment: 23.2% (15/65);<br>Females: 17.1% (7/44)<br>Males: 38.1% (8/21)<br><br>Ranged from 1.6% for sexual intimacy to 18.4% for unwelcome sexual comments.<br>In this setting, males experienced a higher prevalence of sexual harassment than females. | Not asked. | Senior student (most common), lecturer, outsider. | Not applicable |

|                      |                 |             |                                  |                               |    |                                                                                                                                                                                                                                                                                                                                                                                                                                                                                                                                                                                                                                                                 |               |                                                                                                                                          |                         |                                   |                |
|----------------------|-----------------|-------------|----------------------------------|-------------------------------|----|-----------------------------------------------------------------------------------------------------------------------------------------------------------------------------------------------------------------------------------------------------------------------------------------------------------------------------------------------------------------------------------------------------------------------------------------------------------------------------------------------------------------------------------------------------------------------------------------------------------------------------------------------------------------|---------------|------------------------------------------------------------------------------------------------------------------------------------------|-------------------------|-----------------------------------|----------------|
|                      |                 |             |                                  |                               |    | intimacy, unwanted touching of genitals or breasts.                                                                                                                                                                                                                                                                                                                                                                                                                                                                                                                                                                                                             |               |                                                                                                                                          |                         |                                   |                |
| Owoaje, et al (2011) | Ibadan, Nigeria | Educational | Male and female medical students | Cross-sectional study (n=269) | No | Adapted from Rautio et al (2005):<br>1) If you have been subjected to sexual harassment or discrimination, what form did it take? (Check all that apply): denied opportunities, exchange of rewards for sexual favours; sexual advances; sexist slurs; sexist materials; malicious gossip, favouritism, poor evaluations;<br>2) How often, if ever, have any of the following persons subjected you to sexual harassment or discrimination (e.g. favouritism, advances, slurs, sexist teaching material)?<br>Fellow students, consultants, registrars, assistants, lecturers, nurses, laboratory workers.<br>3) All of the above perpetrators asked in terms of | Not specified | Overall prevalence: 33.8%<br>Females: 40.4%<br>Males (29.7%).<br><br>Most common type of sexual harassment was unwanted sexual advances. | Most common: 2-3 times. | Resident doctors, and consultants | Not applicable |

|                        |            |                                           |                                            |                                  |     |                                                                                                                                                                                                                                                                                                                                                                                     |                |                                                                                                                                                                                             |                                         |                                                                                                                   |                                                                                                    |
|------------------------|------------|-------------------------------------------|--------------------------------------------|----------------------------------|-----|-------------------------------------------------------------------------------------------------------------------------------------------------------------------------------------------------------------------------------------------------------------------------------------------------------------------------------------------------------------------------------------|----------------|---------------------------------------------------------------------------------------------------------------------------------------------------------------------------------------------|-----------------------------------------|-------------------------------------------------------------------------------------------------------------------|----------------------------------------------------------------------------------------------------|
|                        |            |                                           |                                            |                                  |     | frequency (never, rarely (1-2 times), sometimes (3-4 times), often (5 or more times).                                                                                                                                                                                                                                                                                               |                |                                                                                                                                                                                             |                                         |                                                                                                                   |                                                                                                    |
| Fernandes et al (2012) | Goa, India | Community survey in urban and rural areas | Youth aged 16-24 years (males and females) | Cross-sectional survey (n=3,662) | No  | One question on sexual harassment: Ever been talked to about sex in away that was uncomfortable (yes, no)                                                                                                                                                                                                                                                                           | Lifetime       | 11.9% (n=414)<br>Not disaggregated by sex.                                                                                                                                                  | Not asked                               | Not asked                                                                                                         | Common mental disorders                                                                            |
| Norman et al (2012)    | Ghana      | Educational (19 public universities)      | University students (males and females)    | Cross-sectional survey (n=883)   | Yes | Adapted version of 25-item Sexual Experiences Questionnaire-US Department of Defense (SEQ-DoD; Bastian, Lancaster, & Reyst, 1995). It is reported in five broad categories: (1) Crude/Offensive behavior; (2) Sexist behaviour; (3) Unwanted sexual attention; (4) Sexual coercion; and (5) Sexual assault. Final question on whether they consider the above as sexual harassment. | Past 12 months | Overall prevalence: 6.2% (55/883);<br>Females: 4% of total (36/893) and 66% of those sexually harassed (36/55)<br>Males: 2.1% of total (19/883) and 34% of those sexually harassed (19/55). | Majority reported few times (2-5 times) | Other students (asked from list of: classmate, other student, lecturer/instructor/supervisor, other school staff) | Range of health effects ranging from psychological trauma to irritability loss of trust in friends |

|                           |              |                                                          |                            |                                |     |                                                                                                                                                                                                                                                                                                                                                             |              |                                                                                                                                                                                                                                                                                                                                                                                                                                                                          |                                                                                                                     |           |                |
|---------------------------|--------------|----------------------------------------------------------|----------------------------|--------------------------------|-----|-------------------------------------------------------------------------------------------------------------------------------------------------------------------------------------------------------------------------------------------------------------------------------------------------------------------------------------------------------------|--------------|--------------------------------------------------------------------------------------------------------------------------------------------------------------------------------------------------------------------------------------------------------------------------------------------------------------------------------------------------------------------------------------------------------------------------------------------------------------------------|---------------------------------------------------------------------------------------------------------------------|-----------|----------------|
| Lahsaeizadeh et al (2012) | Shiraz, Iran | Educational, but asked about experience in public places | Female university students | Cross-sectional survey (n=369) | Yes | 13 item sexual harassment questions categorised by visual harassment, verbal harassment, following, and touching harassment.                                                                                                                                                                                                                                | Past 2 years | No overall prevalence, but acts. Staring most prevalent (97% 358/369); shoving or touching (87% 321/369), eyeing the woman's body up and down (86% 315/369), comment on the woman's appearance (85% 315/369), and sitting too close to women or not giving them enough space in a taxi (85% 315/369) most prevalent kinds of harassment.                                                                                                                                 | These were asked but not reported<br>0 = never,<br>1 = rarely,<br>2 = sometimes,<br>3 = often,<br>4 = almost always | Strangers | Not applicable |
| Dhlomo et al (2012)       | Zimbabwe     | Educational                                              | Female students (21-35y)   | Cross-sectional survey (n=136) | No  | 15 items of the Sexual Experiences Questionnaire (SEQ) adapted from Fitzgerald et al., (1995). The measure of perceived sexual harassment had three domains: gender harassment (3 items), unwanted sexual attention (5 items), and sexual coercion (7 items).<br><br>Participants also asked to describe the action after the sexual harassment experience. | Ever         | Overall, 31% (43/136) sexually harassed.<br><u>Gender harassment</u> : Suggestive stories and offensive jokes most common mode of harassment (46%).<br><u>Unwanted sexual attention</u> : ~ 46% been told suggestive stories and jokes, 30% shown sexist or suggestive materials, and 24% subjected to crude or offensive remarks.<br><u>Sexual coercion</u> : 25% Unwanted attempts to have sex; 18% implied better grades or favours if you were sexually cooperative. | Not asked                                                                                                           | Not asked | Not applicable |

|                         |                        |                                 |                                                                    |                                   |     |                                                                                                                                                                                                                                                                           |                |                                                                                                                                                                                           |                    |                                                                                                                    |                                  |
|-------------------------|------------------------|---------------------------------|--------------------------------------------------------------------|-----------------------------------|-----|---------------------------------------------------------------------------------------------------------------------------------------------------------------------------------------------------------------------------------------------------------------------------|----------------|-------------------------------------------------------------------------------------------------------------------------------------------------------------------------------------------|--------------------|--------------------------------------------------------------------------------------------------------------------|----------------------------------|
| Hutagalang et al (2012) | Klang Valley, Malaysia | Workplace                       | Female employees at three universities                             | Cross-sectional survey (n=1423)   | Yes | Sex and the Workplace Questionnaire developed by Gutek (1985) developed using 8 question items related to verbal and non-verbal sexual harassment.<br><br>The marking scheme used 3 scales, ranging from 1(never) - 3 (ever) .                                            | Ever           | 52.7% (750/1423) experienced sexual harassment.<br><br>No further breakdown provided.                                                                                                     | Not asked          | Not asked                                                                                                          | Job satisfaction and work stress |
| Park et al (2013)       | South Korea            | Workplace                       | National working population sample, aged 15-65 (males and females) | Cross-sectional survey (N=10,039) | No  | Direct question in the Korean Working Conditions Survey (KWCS) and SH was included as a covariate in this study: Over the past 12 months, have you been subjected to sexual harassment at work? (yes/no)                                                                  | Past 12 months | n=63 (0.6%)<br><br>Not disaggregated by sex.                                                                                                                                              | Not asked          | Not asked                                                                                                          | Work-related sleep problems      |
| Norman et al (2013)     | Ghana                  | Educational (4 medical schools) | Medical students (males and females)                               | Cross-sectional survey (n=409)    | No  | Adapted version of 25-item Sexual Experiences Questionnaire-US Department of Defense (SEQ-DoD; Bastian, Lancaster, & Reyst, 1995). It is reported in five broad categories: (1) Crude/Offensive behavior; (2) Sexist behaviour; (3) Unwanted sexual attention; (4) Sexual | Past 12 months | Overall: 14.4% (n=59/409)<br>females: 8.8% (36/409)<br>males: 5.6% (23/409)<br><br>Most prevalent form in females was inappropriate or unwanted gifts for sex (71.4%) and unwanted sexual | Not shown in paper | Lecturer<br><br>(asked from list of: classmate, other student, lecturer/instructor/supervisor, other school staff) | Psychological distress           |

|                          |              |                           |                                                                                        |                                |     |                                                                                                                                                                                                                                                                                                             |                |                                                                                                                                                                                                                                      |           |                                                                                                                 |                                                                                        |
|--------------------------|--------------|---------------------------|----------------------------------------------------------------------------------------|--------------------------------|-----|-------------------------------------------------------------------------------------------------------------------------------------------------------------------------------------------------------------------------------------------------------------------------------------------------------------|----------------|--------------------------------------------------------------------------------------------------------------------------------------------------------------------------------------------------------------------------------------|-----------|-----------------------------------------------------------------------------------------------------------------|----------------------------------------------------------------------------------------|
|                          |              |                           |                                                                                        |                                |     | coercion; and (5) Sexual assault. Final question on whether they consider the above as sexual harassment.                                                                                                                                                                                                   |                | comments or jokes (57.1%).                                                                                                                                                                                                           |           |                                                                                                                 |                                                                                        |
| Norman et al (2013)      | Accra, Ghana | Faith Based Organisations | Clergy and lay members (male and female); 18-60 years                                  | Cross-sectional survey (n=600) | No  | Adapted version of 25-item Sexual Experiences Questionnaire-US Department of Defense (SEQ-DoD; Bastian, Lancaster, & Reyst, 1995). It is reported in five broad categories: (1) Crude/Offensive behavior; (2) Sexist behaviour; (3) Unwanted sexual attention; (4) Sexual coercion; and (5) Sexual assault. | Past 12 months | Females: 73% ; Males: 27% Sexually harassed when attending a religious activity but numerator and denominator unclear.<br><br>Primarily reported unwanted physical contact or comments or jokes, inappropriate gifts, and even rape. | Not asked | Both female on male and male on female harassment was common (and main perpetrators were members of the clergy) | Loss of trust of other religious members fear of the general public; feelings changed. |
| de Puisseau et al (2013) | Benin        | Educational               | Students from 7 high schools across urban and rural areas in Benin (males and females) | Cross-sectional survey (n=249) | Yes | Three questions about sexual harassment (used the French term <i>harcelement sexuel</i> in the questionnaires). (1) whether participants had experienced sexual harassment at school (personal; among peers only;                                                                                           | Lifetime       | Overall 41% among males (72/176) and females (30/73)<br><br>(similar proportion among both males and females).                                                                                                                       | Not asked | Not asked                                                                                                       | Not applicable                                                                         |

|                       |                       |                            |                               |                                                                                        |    |                                                                                                                                                                                                                                                                                                             |                       |                                                                                                                                                                                                                                                                                                                 |           |                             |                |
|-----------------------|-----------------------|----------------------------|-------------------------------|----------------------------------------------------------------------------------------|----|-------------------------------------------------------------------------------------------------------------------------------------------------------------------------------------------------------------------------------------------------------------------------------------------------------------|-----------------------|-----------------------------------------------------------------------------------------------------------------------------------------------------------------------------------------------------------------------------------------------------------------------------------------------------------------|-----------|-----------------------------|----------------|
|                       |                       |                            |                               |                                                                                        |    | no; don't know).(2) indicate their self-perceived probability of experiencing sexual harassment at school on a scale ranging from 0 (not likely at all) to 10 (very likely); (3) whether participants feared experiencing sexual harassment at school (3 much fear; 2 some fear; 1 little fear; 0 no fear). |                       |                                                                                                                                                                                                                                                                                                                 |           |                             |                |
| Haile et al (2013)    | Addis Ababa, Ethiopia | Educational                | Male secondary students       | Cross-sectional study (n=830)                                                          | No | Sexual harassment asked but question unclear. Also, seems to be part of questions on sexual abuse and sexual coercion.                                                                                                                                                                                      | Lifetime and 12 month | Males:<br>Lifetime: 68.2%.<br>12 month: 21.4%                                                                                                                                                                                                                                                                   | Not asked | Not asked                   | Not applicable |
| Austrian et al (2014) | Kampala, Uganda       | Low income community areas | Adolescent girls (ages 10-19) | Two treatment (savings plus and savings only) and comparison (two wave) trial (n=1064) | No | Sexual harassment was constructed using two dichotomous variables indicating girls who agreed with the statements: (1) In the past six months I have been touched indecently by someone of the opposite sex in my neighborhood, and (2) In my neighborhood, people of the                                   | Past 6 months         | <u>Savings plus:</u><br>Proportion of girls who experienced indecent touching: 8%.<br>Proportion who were teased by members of the opposite sex: 24%.<br><u>Savings only:</u><br>Proportion of girls who experienced indecent touching: 15%.<br>Proportion who were teased by members of the opposite sex: 25%. | Not asked | Members of the opposite sex | Not applicable |

opposite  
sex tease me as I  
go about my day.

|                        |                         |           |                                               |                                          |    |                                                                                                                                                                                                                                                                                                                                                                                                                                                       |                 |                                                                      |                                                                                    |               |                  |
|------------------------|-------------------------|-----------|-----------------------------------------------|------------------------------------------|----|-------------------------------------------------------------------------------------------------------------------------------------------------------------------------------------------------------------------------------------------------------------------------------------------------------------------------------------------------------------------------------------------------------------------------------------------------------|-----------------|----------------------------------------------------------------------|------------------------------------------------------------------------------------|---------------|------------------|
| Maurya et al<br>(2014) | Uttar Pradesh,<br>India | Workplace | Civil police<br>officers (male<br>and female) | Cross-<br>sectional<br>survey<br>(n=118) | No | Sexual harassment<br>measured as part<br>of the Workplace<br>Harassment scale<br>developed by<br>Berdahl and Moore<br>(2006). From this<br>scale, 14 items<br>focused on<br>traditional sexual<br>harassment (sexist<br>and sexual<br>comments,<br>unwanted sexual<br>attention, and<br>sexual<br>coercion); 11 of the<br>14 questions were<br>based on items<br>from the Sexual<br>Experiences<br>Questionnaire (SEQ;<br>Fitzgerald, et al,<br>1995) | Past 2<br>years | Traditional sexual<br>harassment<br><br>Females: 9.7%<br>Males: 6.7% | Result not<br>clear.<br><br>Scale from 0<br>(never) to 4<br>(most of the<br>time). | Not specified | Mental<br>health |
|------------------------|-------------------------|-----------|-----------------------------------------------|------------------------------------------|----|-------------------------------------------------------------------------------------------------------------------------------------------------------------------------------------------------------------------------------------------------------------------------------------------------------------------------------------------------------------------------------------------------------------------------------------------------------|-----------------|----------------------------------------------------------------------|------------------------------------------------------------------------------------|---------------|------------------|

|                     |                 |             |                                  |                                |     |                                                                                                                                                                                                                                                                                                                                                                                                                                                             |          |                                                       |           |                                                                                                                                     |                        |
|---------------------|-----------------|-------------|----------------------------------|--------------------------------|-----|-------------------------------------------------------------------------------------------------------------------------------------------------------------------------------------------------------------------------------------------------------------------------------------------------------------------------------------------------------------------------------------------------------------------------------------------------------------|----------|-------------------------------------------------------|-----------|-------------------------------------------------------------------------------------------------------------------------------------|------------------------|
| Mamaru et al (2015) | Jimma, Ethiopia | Educational | Jimma University female students | Cross-sectional survey (n=385) | Yes | Pre-tested questionnaire containing acts of physical, verbal and nonverbal SH items. <u>Physical:</u> purposely bumping or hurting someone, raping, attempting rape, and inappropriate touching. <u>Verbal:</u> Inappropriate sexual comments about body parts, telling sexual or dirty jokes and asking a favor for having sexual intercourse. <u>Non-verbal:</u> displaying inappropriate pictures through email/social media, inappropriate eye contact. | Lifetime | Physical: 78.2%<br>Verbal: 90.4%<br>Non-verbal: 80.0% | Not asked | University students<br><br>(asked from list: university students, off campus boys, university teachers, total administrative staff) | Psychological distress |
|---------------------|-----------------|-------------|----------------------------------|--------------------------------|-----|-------------------------------------------------------------------------------------------------------------------------------------------------------------------------------------------------------------------------------------------------------------------------------------------------------------------------------------------------------------------------------------------------------------------------------------------------------------|----------|-------------------------------------------------------|-----------|-------------------------------------------------------------------------------------------------------------------------------------|------------------------|

|                     |                         |             |                                                |                                |     |                                                                                                                                                                                                                                                                                                                                                                          |                  |                                                                                                                                                                                           |                                                                                                                                 |                                                                  |                |
|---------------------|-------------------------|-------------|------------------------------------------------|--------------------------------|-----|--------------------------------------------------------------------------------------------------------------------------------------------------------------------------------------------------------------------------------------------------------------------------------------------------------------------------------------------------------------------------|------------------|-------------------------------------------------------------------------------------------------------------------------------------------------------------------------------------------|---------------------------------------------------------------------------------------------------------------------------------|------------------------------------------------------------------|----------------|
| Tobar et al (2015)  | Mansoura, Egypt         | Educational | University students (males and females)        | Cross-sectional survey (n=744) | Yes | Two forms: one form for male participants (16 items) and the other for female participants (12 items); both were in Arabic.<br>It included items on perception of the problem of harassment, frequency of occurrence and direct experience, and feelings and attitudes toward harassment. Men were not asked the question on whether they experienced sexual harassment. | Lifetime         | Overall prevalence in females was 73% (258/354).                                                                                                                                          | Appears to be collected as ever in their lifetime and more than half of the sample of women reported experiencing SH 1-3 times. | Unclear, but study mention male harassers                        | Not applicable |
| Kunwar et al (2015) | Kailali district, Nepal | Workplace   | Female respondents in public sector employment | Cross-sectional survey (n=92)  | Yes | No measure specified.                                                                                                                                                                                                                                                                                                                                                    | Ever or lifetime | Overall prevalence : 77.2% (71/92)<br>Verbal (teasing or vulgar jokes): 56.3% (40/92)<br>Physical (unwanted touching) 16.9% (12/92)<br>Non-verbal: 11.3% (8/92)<br>Emotional: 7.0% (5/92) | Not asked                                                                                                                       | Co-worker (52.1%), immediate supervisor (19.7%), manager (12.7%) | Not applicable |

|                       |                                    |                               |                                                                 |                                  |     |                                                                                                                                                                                                                 |                |                                                                                                                                                                                                                         |                                                                                                                                     |                                                                                                                                        |                |
|-----------------------|------------------------------------|-------------------------------|-----------------------------------------------------------------|----------------------------------|-----|-----------------------------------------------------------------------------------------------------------------------------------------------------------------------------------------------------------------|----------------|-------------------------------------------------------------------------------------------------------------------------------------------------------------------------------------------------------------------------|-------------------------------------------------------------------------------------------------------------------------------------|----------------------------------------------------------------------------------------------------------------------------------------|----------------|
| Sahraian et al (2016) | Shiraz, Iran                       | Educational/Teaching hospital | Medical students (males and females)                            | Cross sectional survey (n=193)   | Yes | Direct question on sexual harassment - have they been sexually harassed? Asked by frequency: never, sometimes, several times<br><br>Taken from the Workplace violence questionnaire created by ILO/WHO/ICN/PSI. | Past 12 months | 26.1% (49/193) reported sexual harassment;<br><br>33.6% female students;<br><br>10.3% male students                                                                                                                     | 56.3% sometimes experienced physical sexual harassment; 77% verbal sexual harassment. Choice asked: once, sometimes, several times. | Physician colleagues                                                                                                                   | Not applicable |
| Tripathi et al (2016) | Udupi, India                       | Workplace                     | Workers from fisheries in the Malpe harbour (males and females) | Cross-sectional survey (n=171)   | No  | Questionnaire that asked about the occurrence of any events of verbal abuse, physical abuse and a direct question on sexual harassment (have they been sexually harassed? )                                     | Past 12 months | Female workers: 0.6% (n=1)                                                                                                                                                                                              | Not asked                                                                                                                           | Male fishermen                                                                                                                         | Not applicable |
| Vuckovic et al (2016) | Mtwara and Dar Es Salaam, Tanzania | Public sector workplaces      | Male and female civil servants in rural and urban areas         | Cross-sectional survey (n=1,593) | Yes | Unclear, but appears to be a direct question: Have you ever been sexually harassed?<br><br>Also, have a follow-up question on their reaction to being sexually harassed.                                        | Lifetime       | Females: 20.5% (129/629 females)<br>Males: 12% (116/964 males).<br><br>Figure among females was 27.8% when asked about avoiding the person who sexually harassed them, suggesting a discrepancy due to under-reporting. | Not asked                                                                                                                           | Male superiors, especially heads of departments.<br><br>Asked from a list of: supervisors or leaders, heads of facilities/departments. | Not applicable |

|                       |                |                  |                                                        |                                                         |                       |                                                                                                                                                                                                                                                                                                               |                       |                                                                                                      |                                                     |                       |                                |
|-----------------------|----------------|------------------|--------------------------------------------------------|---------------------------------------------------------|-----------------------|---------------------------------------------------------------------------------------------------------------------------------------------------------------------------------------------------------------------------------------------------------------------------------------------------------------|-----------------------|------------------------------------------------------------------------------------------------------|-----------------------------------------------------|-----------------------|--------------------------------|
| Zhang et al (2016)    | Hong Kong      | Community        | Population based, young adults (males and females)     | Cross-sectional survey (Youth Sexuality Study) (n=1223) | Yes                   | Sexual harassment questions: experienced unwelcome sexual advances; experienced requests for sexual favour; and experienced other verbal or physical harassment of a sexual nature.                                                                                                                           | Lifetime and 6 months | <b>Females:</b> 2.3% (6-month) & 13.2% (lifetime)<br><b>Males:</b> 0.6% (6-month) to 3.6% (lifetime) | Asked if 0 (none), 1 (once), and 2 (twice or more). | Males towards females | Pregnanc                       |
| Xie et al (2017)      | Western China  | Educational      | Medical students (males and females)                   | Cross sectional survey (n=157)                          | No                    | Self-administered questionnaire. Details of questions not included. Brief indication of question on verbal sexual harassment (patients flirted with students) and physical sexual harassment (patients physically touched students). Sexual harassment was measured as verbal and physical sexual harassment. | Past 12 months        | Verbal: 8.3%<br>Physical: 1.6%<br><br>Not disaggregated by sex.                                      | Not asked                                           | Patients              | Student's quality of (SF-36 sc |
| Tripathi et al (2017) | Lucknow, India | Public transport | Third year university female students aged 18-29 years | Cross-sectional survey (n=200)                          | Yes, but not explicit | Designed a victimisation survey. To overcome measurement issues around acts and differences in perceptions of acts considered to be SH, the survey used descriptive categories of sexual crimes against women added to                                                                                        | Past 6 months         | 25% of the students have experienced more than ten incidents per month                               | Not asked                                           | Strangers             | Not applicabl                  |

|                      |               |                 |                                 |                               |     |                                                                                                                                                                                                                                                                                                                                                                                                                                                                    |                                                                                           |                                                              |                                            |                                 |                |
|----------------------|---------------|-----------------|---------------------------------|-------------------------------|-----|--------------------------------------------------------------------------------------------------------------------------------------------------------------------------------------------------------------------------------------------------------------------------------------------------------------------------------------------------------------------------------------------------------------------------------------------------------------------|-------------------------------------------------------------------------------------------|--------------------------------------------------------------|--------------------------------------------|---------------------------------|----------------|
|                      |               |                 |                                 |                               |     | the Indian law after the 2012 Delhi gang rape case. Acts were: (a) Any unwelcome physical, verbal or non-verbal conduct of sexual nature; (b) demand or request for sexual favors; (c) making sexually colored remarks (d) physical contact and advances; or (e) showing pornography.                                                                                                                                                                              |                                                                                           |                                                              |                                            |                                 |                |
| Talboys et al (2017) | Punjab, India | Rural community | Rural, young females aged 18-26 | Cross-sectional survey (n=89) | Yes | Eve Teasing Questionnaire–Mental Health (ETQ-MH).The questionnaire included questions about (a) eve teasing exposure, nature, timing, and intensity; (b) chronicity, which delineates onetime or ongoing harassment. Actual questions were:<br>a) Have you ever been eve-teased?<br>b) When was the last time you were eve-teased?<br>c) I am going to read you this list of behaviours. As I read each one, can you tell me if you have been the target of any of | Scale that ranged from past week. Past month, <3 months, 3-7 months, 7-12 months, > year. | 48.3% (43/89) (Ever eve-teased)<br>37.1% (33/89) (past year) | 30.6% reported as on-going versus one-time | Men or boys known to the victim | Not applicable |

|                   |                  |             |                                                                              |                                |     |                                                                                                                                                                                                                                                                                                                                                                                      |                      |                                                                                                         |           |                                             |                |
|-------------------|------------------|-------------|------------------------------------------------------------------------------|--------------------------------|-----|--------------------------------------------------------------------------------------------------------------------------------------------------------------------------------------------------------------------------------------------------------------------------------------------------------------------------------------------------------------------------------------|----------------------|---------------------------------------------------------------------------------------------------------|-----------|---------------------------------------------|----------------|
|                   |                  |             |                                                                              |                                |     | these in the <u>past year</u> by men/boys: staring; stalking; making vulgar gestures; passing an insulting or threatening comment; pushing or brushing by accident                                                                                                                                                                                                                   |                      |                                                                                                         |           |                                             |                |
| Aina et al (2018) | Delhi, India     | Educational | Male and female private and public university students                       | Cross-sectional survey (n=430) | Yes | Direct question: Have you experienced any form of sexual harassment in your institution?                                                                                                                                                                                                                                                                                             | Ever or lifetime     | 16.3% (35/215) (private university), 18.6% (40/215) (public university)<br><br>Not disaggregated by sex | Not asked | Not asked                                   | Not applicable |
| Dar et al (2018)  | Lahore, Pakistan | Hospital    | Female patients diagnosed with conversion disorder at three public hospitals | Cross-sectional survey (n=51)  | No  | 3 questions on sexual harassment included in the Urdu version of the Traumatic Experiences Checklist (TEC). The questions are direct questions on sexual harassment enquiring on the family. These are:<br>1) Sexual harassment (acts of a sexual nature that DO NOT involve physical contact) by your parents, brothers, or sisters.<br>Y/N<br>2) Sexual harassment by more distant | Ever (not specified) | 65% (33/51) reported sexual harassment.                                                                 | Not asked | The main perpetrator was outside the family | Not applicable |

|                      |                  |             |                                                              |                                                                                                         |    | members of your family. Y/N                                                                                                                                                                                   |                                                                                                                                                                                                                                                                                                      |                |                                                                                                                                                                                                                                        |              |                        |                                                                  |
|----------------------|------------------|-------------|--------------------------------------------------------------|---------------------------------------------------------------------------------------------------------|----|---------------------------------------------------------------------------------------------------------------------------------------------------------------------------------------------------------------|------------------------------------------------------------------------------------------------------------------------------------------------------------------------------------------------------------------------------------------------------------------------------------------------------|----------------|----------------------------------------------------------------------------------------------------------------------------------------------------------------------------------------------------------------------------------------|--------------|------------------------|------------------------------------------------------------------|
| Ul-Haq et al (2018)  | Lahore, Pakistan | Educational | 1st and 2nd year medical students (male and female)          | Cross-sectional study (n=358)                                                                           | No | 3) Sexual harassment by non-family members. Y/N<br>FOR EACH, how much of an impact did this have on you? 1-5 (none to an extreme amount).                                                                     | Direct question from the Medical School Graduation Questionnaire (developed by the American Association of Medical Colleges) : Have you experienced any form of sexual harassment in your institution? The responses consisted of a Likert scale ranging from never, once, occasionally, frequently. | Ever           | Overall, 2.5% (9/358) experienced sexual harassment once, 4.2% (15/358) occasionally, and 3.6% (13/358) frequently.<br><br>Sexual harassment was reported more frequently in male students as opposed to female students (56.8%>43.2%) | Occasionally | Faculty and classmates | Not applicable                                                   |
| Mabetha et al (2018) | South Africa     | Educational | School-going adolescents, male and female (aged 10-19 years) | Cross sectional survey (South African National HIV, Behaviour and Health Survey (2011/2012). N=219,456) | No | Having experienced sexual harassment using the following criteria: (i) boys sexually harassing girls by touching, threatening or making rude remarks to them; (ii) girls sexually harassing boys by touching, | Having experienced sexual harassment using the following criteria: (i) boys sexually harassing girls by touching, threatening or making rude remarks to them; (ii) girls sexually harassing boys by touching,                                                                                        | Past 12 months | 30.1% of respondents had experienced peer sexual harassment and 6.2 had experienced teacher sexual harassment.                                                                                                                         | Not asked    | Peers and teachers.    | Risky sex behaviour (non use of condom) multiple sexual partners |

|                    |                   |           |                                                 |                                |       |                                                                                                                                                                                                                                                                                                                                                                                                                                                                                                                      |               |                                                                                                                                                                                                                          |           |                |                                                               |
|--------------------|-------------------|-----------|-------------------------------------------------|--------------------------------|-------|----------------------------------------------------------------------------------------------------------------------------------------------------------------------------------------------------------------------------------------------------------------------------------------------------------------------------------------------------------------------------------------------------------------------------------------------------------------------------------------------------------------------|---------------|--------------------------------------------------------------------------------------------------------------------------------------------------------------------------------------------------------------------------|-----------|----------------|---------------------------------------------------------------|
|                    |                   |           |                                                 |                                |       | threatening or making rude remarks to them; (iii) male educators proposing relationships with female learners; (iv) female educators proposing relationships with male learners, and (v) educators proposing relationships with learners of the same sex. 'Peer perpetrated sexual harassment' refers to positive responses ('always' or 'often') to criterion i or ii, while positive responses to criterion iii, iv or v were coded as 'teacher-perpetrated sexual harassment' using principle component analysis. |               |                                                                                                                                                                                                                          |           |                |                                                               |
| Akoku et al (2019) | Yaounde, Cameroon | Workplace | Female bar workers (FBW) (Median age: 29 years) | Cross-sectional survey (n=410) | Yes . | Definition of sexual harassment read out and respondents asked if they had experienced any behaviour of that sort from male customers in <3 months.<br><br>If yes, then read out                                                                                                                                                                                                                                                                                                                                     | Past 3 months | Most prevalent forms: Sexual advances including requesting telephone numbers to contact them later for a date (90.9%), sexually suggestive comments or jokes that made FBWs felt offended (76.3%), Inappropriate staring | Not asked | Male customers | Depressive symptom: (five-item mental health inventory scale) |

|                      |                            |           |                                       |                                |    |                                                                                                                                                                                                                                                                                                                                                                                                                                                                                                 |           |                                                                                                                                                             |           |           |                |
|----------------------|----------------------------|-----------|---------------------------------------|--------------------------------|----|-------------------------------------------------------------------------------------------------------------------------------------------------------------------------------------------------------------------------------------------------------------------------------------------------------------------------------------------------------------------------------------------------------------------------------------------------------------------------------------------------|-----------|-------------------------------------------------------------------------------------------------------------------------------------------------------------|-----------|-----------|----------------|
|                      |                            |           |                                       |                                |    | a list of 7 behaviours likely to constitute sexual harassment by male customers: sexual advances asking for a date ; sexually suggestive and offensive comments; inappropriate staring that made you feel uncomfortable; repeated demands for a date despite your rejection; touching parts of your body like buttocks or breasts; asking intrusive questions about your private and physical appearance; unwelcome physical contact from male customers including hugging or forcibly kissing. |           | or leering that made FBWs felt uncomfortable (70.7%).<br><br>Summary: 98.8% (405/410) experienced one or more forms of sexual harassment in the < 3 months. |           |           |                |
| Murshid et al (2019) | Urban and rural Bangladesh | Community | Adolescent boys and girls (age 12-19) | Household level survey (n=520) | No | Measures not clearly stated, but mention five items relating to experiencing sexual harassment or "eve teasing" and insecurity.                                                                                                                                                                                                                                                                                                                                                                 | Not clear | Females and males: 64%<br><br>Not disaggregated by sex.                                                                                                     | Not asked | Not asked | Not applicable |

|                  |                  |           |                                             |                                  |     |                                                                                                                                                                                                                                                                                                                                                                                                                                      |                  |                                                                                                                                      |           |                                  |                                                    |
|------------------|------------------|-----------|---------------------------------------------|----------------------------------|-----|--------------------------------------------------------------------------------------------------------------------------------------------------------------------------------------------------------------------------------------------------------------------------------------------------------------------------------------------------------------------------------------------------------------------------------------|------------------|--------------------------------------------------------------------------------------------------------------------------------------|-----------|----------------------------------|----------------------------------------------------|
| Zhu et al (2019) | Shangdong, China | Workplace | Frontline hotel employees (male and female) | Three phase field survey (n=266) | Yes | 21 items scale adapted by Murry et al. (2001) from the scale created by Fitzgerald et al. (1995).<br>Comprise of four dimensions: <i>gender harassment</i> (e.g., treating someone differently because of their sex), <i>crude and offensive behaviours</i> (making offensive sexual gestures), <i>unwanted sexual attention</i> (staring, whistling in a sexual way) and <i>sexual coercion</i> (implied faster promotion for sex). | Ever or lifetime | ~14% (36/266) of the respondents reported experiencing workplace sexual harassment.<br><br>28 % reporting moderate to severe levels. | Not asked | Supervisors/co-workers/customers | Depression and work related interpersonal deviance |
|------------------|------------------|-----------|---------------------------------------------|----------------------------------|-----|--------------------------------------------------------------------------------------------------------------------------------------------------------------------------------------------------------------------------------------------------------------------------------------------------------------------------------------------------------------------------------------------------------------------------------------|------------------|--------------------------------------------------------------------------------------------------------------------------------------|-----------|----------------------------------|----------------------------------------------------|

|                      |                  |                  |                                                      |                                |     |                                                                                                                                                                                                                                                                                                                                                                                                                            |                |                                                                                                                                                                                                                                                                               |                                                                                                   |                                                                                                   |                |
|----------------------|------------------|------------------|------------------------------------------------------|--------------------------------|-----|----------------------------------------------------------------------------------------------------------------------------------------------------------------------------------------------------------------------------------------------------------------------------------------------------------------------------------------------------------------------------------------------------------------------------|----------------|-------------------------------------------------------------------------------------------------------------------------------------------------------------------------------------------------------------------------------------------------------------------------------|---------------------------------------------------------------------------------------------------|---------------------------------------------------------------------------------------------------|----------------|
| Saberi et al (2019)  | Kashan, Iran     | Workplace        | Female workers in the industrial sector              | Cross-sectional survey (n=817) | No  | ILO/WHO/INA workplace violence questionnaires translated into Persian. 78 items on violence at work. The section that focused on sexual harassment asked about unwanted behaviors and actions in which the individual might experience sexual abuse, offense or threats to her health, including sexual comments, deliberately touching, suggestive looks, unwelcome letters and phone calls and acting for sexual favors. | Past 12 months | Overall 12% of females reported sexual harassment.<br><br>Sexual comments and remarks (14.3%), deliberately touched (23.8%), suggestive looks (23.8%), unwelcome letters or phone calls (16.6%).                                                                              | Seldom, monthly weekly, daily.<br><br>Most females reported seldom exposure to sexual harassment. | Co-workers most frequent perpetrators (61%).<br><br>Others were supervisors and office employees. | Not applicable |
| Gautam, et al (2019) | Kathmandu, Nepal | Public transport | Female students (public health and nursing students) | Cross-sectional survey (n=280) | Yes | Questions not provided, but mention of information on type of harassment (verbal, non-verbal and physical), effect of harassment (physical and psychological), type of public transport, time of harassment and perpetrator was collected.                                                                                                                                                                                 | Past 12 months | 78.2% (219/280) of females using public transport reported being harassed. Among unmarried (54%) and married (46%).<br><i>Unmarried:</i> Physical (42.3%), verbal (14.4%) and non-verbal (43.2%).<br><i>Married:</i> Physical (38.6%), verbal (14.9%) and non-verbal (46.5%). | Not asked                                                                                         | Male passenger (93%)                                                                              | Not applicable |

|                    |                       |             |                                                       |                                           |     |                                                                                                                                                                                                                                                                                                                                                                                                                                                                                                                                                                                                            |         |                                                                                                                                                                                                                                                                                                                                                                                                                       |              |                                     |                |
|--------------------|-----------------------|-------------|-------------------------------------------------------|-------------------------------------------|-----|------------------------------------------------------------------------------------------------------------------------------------------------------------------------------------------------------------------------------------------------------------------------------------------------------------------------------------------------------------------------------------------------------------------------------------------------------------------------------------------------------------------------------------------------------------------------------------------------------------|---------|-----------------------------------------------------------------------------------------------------------------------------------------------------------------------------------------------------------------------------------------------------------------------------------------------------------------------------------------------------------------------------------------------------------------------|--------------|-------------------------------------|----------------|
| Huang et al (2019) | Mainland China        | Educational | College students (male and female)                    | Nationwide cross-sectional study (n=2080) | Yes | Modified version of SEQ-DOD (SEQ-China). 25 items of the original SEQ-DOD were adapted; 23 close-ended questions and then 2 open-ended questions.<br>- Have you ever experienced other offences, please describe it;<br>- Have you ever been sexually harassed?<br>Options were never, once, more than once. If once or more than once, then coded yes and also asked to provide gender of harasser. As a follow up: Those who reported experiencing sexual harassment "more than once" were asked to express the emotional and behavioral reactions of "the first time" and "the latest time" harassment. | Ever    | 78% females and 67.3% males reported experiencing some form of sexual harassment.<br><br>For the four categories:<br><i>Sexist hostility</i> : Males (28.6%) females (39.5%)<br><i>Sexual hostility</i> : Males (63%), females (71.2%)<br><i>Unwanted sexual attention</i> : Males (37.4%), females (57.1%)<br><i>Sexual coercion</i> : Males (5.6%), females (5.9%).<br>29.7% reported having been sexually harassed | Not reported | Students (79.3%); Strangers (31.3%) | Not applicable |
| Oni et al (2019)   | Limpopo, South Africa | Educational | College students residing on campus (male and female) | Cross-sectional survey (n=342)            | Yes | Questions not mentioned. Authors mention that it is a structured questionnaire developed based on extensive literature review, coupled with expert                                                                                                                                                                                                                                                                                                                                                                                                                                                         | Unclear | Unwanted touching: males (17.3%), females (25.3%); Personally experienced rape: males (1.3%), females (2.7%); Verbal harassment (unwanted sexual                                                                                                                                                                                                                                                                      | Not asked    | Not asked                           | Not applicable |

---

consultation to ensure sensitive questions were valid.

---

advance, sex-related jokes): Males (12.2%) and females (18.4%)
